# Supplementary material for: Bioengineered phytomolecules-capped silver nanoparticles using Carissa carandas leaf extract to embed on to urinary catheter to combat UTI pathogens
Source: PubMed Central journal article supplement (PMC8412375; doi:10.1371/journal.pone.0256748), 2021-09-02

# PLOS ONE

## Bioengineered phytomolecules-capped silver nanoparticles using Carissa Carandas leaf extract to embed on to urinary catheter to combat UTI pathogens

--Manuscript Draft--

|                                                                                                                                                                                                                                |                                                                                                                                                                                                                                                                                                                                                                                                                                                                                                                                                                                                                                                                                                                                                                                                                                                                                                                                                                                                                                                                                                                                                                                                                                                                                                                                                                                                                                                                                                                                                                                                                                                                                                                                                                                                                                                         |
|--------------------------------------------------------------------------------------------------------------------------------------------------------------------------------------------------------------------------------|---------------------------------------------------------------------------------------------------------------------------------------------------------------------------------------------------------------------------------------------------------------------------------------------------------------------------------------------------------------------------------------------------------------------------------------------------------------------------------------------------------------------------------------------------------------------------------------------------------------------------------------------------------------------------------------------------------------------------------------------------------------------------------------------------------------------------------------------------------------------------------------------------------------------------------------------------------------------------------------------------------------------------------------------------------------------------------------------------------------------------------------------------------------------------------------------------------------------------------------------------------------------------------------------------------------------------------------------------------------------------------------------------------------------------------------------------------------------------------------------------------------------------------------------------------------------------------------------------------------------------------------------------------------------------------------------------------------------------------------------------------------------------------------------------------------------------------------------------------|
| <b>Manuscript Number:</b>                                                                                                                                                                                                      | PONE-D-21-17789                                                                                                                                                                                                                                                                                                                                                                                                                                                                                                                                                                                                                                                                                                                                                                                                                                                                                                                                                                                                                                                                                                                                                                                                                                                                                                                                                                                                                                                                                                                                                                                                                                                                                                                                                                                                                                         |
| <b>Article Type:</b>                                                                                                                                                                                                           | Research Article                                                                                                                                                                                                                                                                                                                                                                                                                                                                                                                                                                                                                                                                                                                                                                                                                                                                                                                                                                                                                                                                                                                                                                                                                                                                                                                                                                                                                                                                                                                                                                                                                                                                                                                                                                                                                                        |
| <b>Full Title:</b>                                                                                                                                                                                                             | Bioengineered phytomolecules-capped silver nanoparticles using Carissa Carandas leaf extract to embed on to urinary catheter to combat UTI pathogens                                                                                                                                                                                                                                                                                                                                                                                                                                                                                                                                                                                                                                                                                                                                                                                                                                                                                                                                                                                                                                                                                                                                                                                                                                                                                                                                                                                                                                                                                                                                                                                                                                                                                                    |
| <b>Short Title:</b>                                                                                                                                                                                                            | Bioengineered phytomolecules-capped silver nanoparticles using Carissa Carandas leaf extract                                                                                                                                                                                                                                                                                                                                                                                                                                                                                                                                                                                                                                                                                                                                                                                                                                                                                                                                                                                                                                                                                                                                                                                                                                                                                                                                                                                                                                                                                                                                                                                                                                                                                                                                                            |
| <b>Corresponding Author:</b>                                                                                                                                                                                                   | Muthupandian Saravanan, Ph.D.,<br>Mekelle University College of Health Sciences<br>Mekelle, Ethiopia ETHIOPIA                                                                                                                                                                                                                                                                                                                                                                                                                                                                                                                                                                                                                                                                                                                                                                                                                                                                                                                                                                                                                                                                                                                                                                                                                                                                                                                                                                                                                                                                                                                                                                                                                                                                                                                                           |
| <b>Keywords:</b>                                                                                                                                                                                                               | AgNPs; uropathogens; Urethral catheter; Surface modification; Biocompatibility; Synergistic effect                                                                                                                                                                                                                                                                                                                                                                                                                                                                                                                                                                                                                                                                                                                                                                                                                                                                                                                                                                                                                                                                                                                                                                                                                                                                                                                                                                                                                                                                                                                                                                                                                                                                                                                                                      |
| <b>Abstract:</b>                                                                                                                                                                                                               | <p>Rising incidents of urinary tract infections (UTIs) among catheterized patients is a noteworthy problem in clinic due to their colonization of uropathogens on abiotic surface. Herein, we have examine the surface modification of urinary catheter by embedding with eco-friendly protocol mediated synthesis of phytomolecules capped silver nanoparticles (AgNPs) to prevent the invasion and colonization of pathogens. The preliminary confirmation of AgNPs production in the reaction mixture was witnessed by the change colour and surface resonance plasmon (SRP) band at 410nm by UV-visible spectroscopy. The morphology, size, crystalline nature, and elemental composition of attained AgNPs were further confirmed by the transmission electron microscopy (TEM), selected area electron diffraction (SAED), X-ray diffraction (XRD) technique, Scanning electron microscopy(SEM) and energy dispersive spectroscopy (EDS). The functional groups of AgNPs with stabilization/capped phytochemicals were detected by Fourier-transform infrared spectroscopy (FTIR). Further, antibiofilm activity of synthesized AgNPs against biofilm producers <i>Staphylococcus aureus</i>, <i>Escherichia coli</i> and <i>Pseudomonas aeruginosa</i> were assayed by CFU and micrographic images. AgNPs coated and coating-free catheters performed to treat with bacterial pathogen to analyze the mat formation and disruption of biofilm formation. Synergistic effect of AgNPs with antibiotic reveals that it can enhance the activity of antibiotics, AgNPs coated catheter reveals the potential antimicrobial activity and antibiofilm activity. In summary, <i>C. carandas</i> leaf extract mediated synthesized AgNPs will open a new avenue as a promising template to embed on urinary catheter to control clinical pathogens.</p> |
| <b>Order of Authors:</b>                                                                                                                                                                                                       | <p>Haajira Beevi Habeeb Rahuman</p> <p>Ranjithkumar Dhandapani</p> <p>Thangavel Sathiamoorthi</p> <p>Ragul Paramasivam</p> <p>Velmurugan Palanivel</p> <p>Muthupandian Saravanan, Ph.D.,</p>                                                                                                                                                                                                                                                                                                                                                                                                                                                                                                                                                                                                                                                                                                                                                                                                                                                                                                                                                                                                                                                                                                                                                                                                                                                                                                                                                                                                                                                                                                                                                                                                                                                            |
| <b>Additional Information:</b>                                                                                                                                                                                                 |                                                                                                                                                                                                                                                                                                                                                                                                                                                                                                                                                                                                                                                                                                                                                                                                                                                                                                                                                                                                                                                                                                                                                                                                                                                                                                                                                                                                                                                                                                                                                                                                                                                                                                                                                                                                                                                         |
| <b>Question</b>                                                                                                                                                                                                                | <b>Response</b>                                                                                                                                                                                                                                                                                                                                                                                                                                                                                                                                                                                                                                                                                                                                                                                                                                                                                                                                                                                                                                                                                                                                                                                                                                                                                                                                                                                                                                                                                                                                                                                                                                                                                                                                                                                                                                         |
| <p><b>Financial Disclosure</b></p> <p>Enter a financial disclosure statement that describes the sources of funding for the work included in this submission. Review the <a href="#">submission guidelines</a> for detailed</p> | <p>The funders had no role in study design, data collection and analysis, decision to publish, or preparation of the manuscript.</p>                                                                                                                                                                                                                                                                                                                                                                                                                                                                                                                                                                                                                                                                                                                                                                                                                                                                                                                                                                                                                                                                                                                                                                                                                                                                                                                                                                                                                                                                                                                                                                                                                                                                                                                    |

requirements. View published research articles from [PLOS ONE](#) for specific examples.

This statement is required for submission and **will appear in the published article** if the submission is accepted. Please make sure it is accurate.

#### Unfunded studies

Enter: *The author(s) received no specific funding for this work.*

#### Funded studies

Enter a statement with the following details:

- Initials of the authors who received each award
- Grant numbers awarded to each author
- The full name of each funder
- URL of each funder website
- Did the sponsors or funders play any role in the study design, data collection and analysis, decision to publish, or preparation of the manuscript?
- **NO** - Include this sentence at the end of your statement: *The funders had no role in study design, data collection and analysis, decision to publish, or preparation of the manuscript.*
- **YES** - Specify the role(s) played.

\* typeset

#### Competing Interests

Use the instructions below to enter a competing interest statement for this submission. On behalf of all authors, disclose any [competing interests](#) that could be perceived to bias this work—acknowledging all financial support and any other relevant financial or non-financial competing interests.

This statement is **required** for submission and **will appear in the published article** if the submission is accepted. Please make sure it is accurate and that any funding sources listed in your Funding Information later in the submission form are also declared in your Financial Disclosure

The authors have declared that no competing interests exist.

statement.

View published research articles from [PLOS ONE](#) for specific examples.

**NO authors have competing interests**

Enter: *The authors have declared that no competing interests exist.*

**Authors with competing interests**

Enter competing interest details beginning with this statement:

*I have read the journal's policy and the authors of this manuscript have the following competing interests: [insert competing interests here]*

\* typeset

**Ethics Statement**

NA

Enter an ethics statement for this submission. This statement is required if the study involved:

- Human participants
- Human specimens or tissue
- Vertebrate animals or cephalopods
- Vertebrate embryos or tissues
- Field research

Write "N/A" if the submission does not require an ethics statement.

General guidance is provided below. Consult the [submission guidelines](#) for detailed instructions. **Make sure that all information entered here is included in the Methods section of the manuscript.**

**Format for specific study types**

**Human Subject Research (involving human participants and/or tissue)**

- Give the name of the institutional review board or ethics committee that approved the study
- Include the approval number and/or a statement indicating approval of this research
- Indicate the form of consent obtained (written/oral) or the reason that consent was not obtained (e.g. the data were analyzed anonymously)

**Animal Research (involving vertebrate animals, embryos or tissues)**

- Provide the name of the Institutional Animal Care and Use Committee (IACUC) or other relevant ethics board that reviewed the study protocol, and indicate whether they approved this research or granted a formal waiver of ethical approval
- Include an approval number if one was obtained
- If the study involved *non-human primates*, add *additional details* about animal welfare and steps taken to ameliorate suffering
- If anesthesia, euthanasia, or any kind of animal sacrifice is part of the study, include briefly which substances and/or methods were applied

**Field Research**

Include the following details if this study involves the collection of plant, animal, or other materials from a natural setting:

- Field permit number
- Name of the institution or relevant body that granted permission

**Data Availability**

Authors are required to make all data underlying the findings described fully available, without restriction, and from the time of publication. PLOS allows rare exceptions to address legal and ethical concerns. See the [PLOS Data Policy](#) and [FAQ](#) for detailed information.

Yes - all data are fully available without restriction

A Data Availability Statement describing where the data can be found is required at submission. Your answers to this question constitute the Data Availability Statement and **will be published in the article**, if accepted.

**Important:** Stating 'data available on request from the author' is not sufficient. If your data are only available upon request, select 'No' for the first question and explain your exceptional situation in the text box.

Do the authors confirm that all data underlying the findings described in their manuscript are fully available without restriction?

**Describe where the data may be found in full sentences. If you are copying our sample text, replace any instances of XXX with the appropriate details.**

- If the data are **held or will be held in a public repository**, include URLs, accession numbers or DOIs. If this information will only be available after acceptance, indicate this by ticking the box below. For example: *All XXX files are available from the XXX database (accession number(s) XXX, XXX).*
- If the data are all contained **within the manuscript and/or Supporting Information files**, enter the following:  
*All relevant data are within the manuscript and its Supporting Information files.*
- If neither of these applies but you are able to provide **details of access elsewhere**, with or without limitations, please do so. For example:

*Data cannot be shared publicly because of [XXX]. Data are available from the XXX Institutional Data Access / Ethics Committee (contact via XXX) for researchers who meet the criteria for access to confidential data.*

*The data underlying the results presented in the study are available from (include the name of the third party*

All relevant data are within the manuscript and its Supporting Information files.

|                                                                                                                                                                                                                                         |                                                                                                                                                                                  |
|-----------------------------------------------------------------------------------------------------------------------------------------------------------------------------------------------------------------------------------------|----------------------------------------------------------------------------------------------------------------------------------------------------------------------------------|
| <p><i>and contact information or URL).</i></p> <ul style="list-style-type: none"><li>• This text is appropriate if the data are owned by a third party and authors do not have permission to share the data.</li></ul> <p>* typeset</p> |                                                                                                                                                                                  |
| Additional data availability information:                                                                                                                                                                                               | Tick here if the URLs/accession numbers/DOIs will be available only after acceptance of the manuscript for publication so that we can ensure their inclusion before publication. |

**Bioengineered phytomolecules-capped silver nanoparticles using *Carissa Carandas* leaf  
extract to embed on to urinary catheter to combat UTI pathogens**

Haajira Beevi Habeeb Rahuman<sup>a†</sup>, Ranjithkumar Dhandapani<sup>a†</sup>, Palanivel Velmurugan<sup>b\*</sup>,  
Thangavel Sathiamoorthi<sup>a</sup>, Ragul Paramasivam<sup>c</sup>, Muthupandian Saravanan<sup>d\*</sup>

<sup>a</sup>Department of Microbiology, Science Campus, Alagappa University, Karaikudi- 630 003,  
Tamilnadu, India

<sup>b</sup>Centre for for Material Engineering and Regenerative Medicine Bharath Institute of Higher  
Education, Chennai, India.

<sup>c</sup>Chimertech Innovations LLP, Tamilnadu Veterinary and Animal Science University,  
Chennai, India

<sup>d</sup> Department of Medical Microbiology and Immunology, Division of Biomedical sciences,  
College of Health Sciences, School of Medicine, Mekelle, Ethiopia.

<sup>†</sup>First two authors has equal contributions

**\*Corresponding authors:**

Muthupandian Saravanan, ( [bioinfosaran@gmail.com](mailto:bioinfosaran@gmail.com)/saravanan.muthupandian@mu.edu.et )

Palanivel Velmurugan, Email: ([palanivelmurgan2008@gmail.com](mailto:palanivelmurgan2008@gmail.com)),

1 **Abstract**

2 Rising incidents of urinary tract infections (UTIs) among catheterized patients is a  
3 noteworthy problem in clinic due to their colonization of uropathogens on abiotic surface. Herein,  
4 we have examine the surface modification of urinary catheter by embedding with eco-friendly  
5 protocol mediated synthesis of phytomolecules capped silver nanoparticles (AgNPs) to prevent the  
6 invasion and colonization of pathogens. The preliminary confirmation of AgNPs production in the  
7 reaction mixture was witnessed by the change colour and surface resonance plasmon (SRP) band  
8 at 410nm by UV–visible spectroscopy. The morphology, size, crystalline nature, and elemental  
9 composition of attained AgNPs were further confirmed by the transmission electron microscopy  
10 (TEM), selected area electron diffraction (SAED), X-ray diffraction (XRD) technique, Scanning  
11 electron microscopy(SEM) and energy dispersive spectroscopy (EDS). The functional groups of  
12 AgNPs with stabilization/capped phytochemicals were detected by Fourier-transform infrared  
13 spectroscopy (FTIR). Further, antibiofilm activity of synthesized AgNPs against biofilm producers  
14 *Staphylococcus aureus*, *Escherichia coli* and *Pseudomonas aeruginosa* were assayed by CFU and  
15 micrographic images. AgNPs coated and coating-free catheters performed to treat with bacterial  
16 pathogen to analyze the mat formation and disruption of biofilm formation. Synergistic effect of  
17 AgNPs with antibiotic reveals that it can enhance the activity of antibiotics, AgNPs coated catheter  
18 reveals the potential antimicrobial activity and antibiofilm activity. In summary, *C. carandas* leaf  
19 extract mediated synthesized AgNPs will open a new avenue as a promising template to embed on  
20 urinary catheter to control clinical pathogens.

21

22 **Key words:** AgNPs, uropathogens, Urethral catheter, Surface modification, Biocompatibility,  
23 Synergistic effect.

24



25

## 26 1. Introduction

27 UTI is broadly defined as an infection of both upper and lower urinary system by  
28 asymptotically or symptomatically involves initial adhesion and colonization on the surface of  
29 the medical devices (catheter). UTI bacteria implicated are  
30 *Staphylococcus* sp., *Streptococcus* sp., *Klebsiella* sp., *Enterococcus* sp., *Proteus* sp., *Pseudomon*  
31 *as* sp. and *Escherichia coli* owing to its biofilm assembly capacity [1-3]. Among most UTI cases  
32 80% are allied with ingrained urinary catheters [4] and associated UTIs is foremost common  
33 infection throughout the world [5]. The colonization of microbial community on medical devices  
34 forms a polymicrobial aggregates called “Biofilm”. Self-generated extracellular polymeric matter  
35 which adhere the surface of the Hospital acquired devices and leading cause of implant failure. It  
36 has been accounted that to control biofilm forming bacteria it need 1500 times higher concentration  
37 of antibiotics when compare to planktonic bacteria [6]. The existence of urine in urinary catheters  
38 makes an appropriate habitation for urease-positive microbes. The pH of the urine increases due  
39 to presence of ammonia that leads to calcium and magnesium phosphate deposition on catheter,  
40 which ultimately leads to thorough constriction of the catheter over coating or crystalline biofilms  
41 [7]. The UTI bacteria cause serious concerns due to spreading to kidney and cause acute or chronic  
42 pyelonephritis [8]. Development of resistant among biofilm producing bacteria against frequent  
43 use drug leads to untreatable. A review by [8] Singha et al., 2017 described the several attempts  
44 have been made to impregnating antimicrobial coating on catheter with antibiotics, antimicrobial  
45 agents (both biocidal and antifouling), antimicrobial peptides, bacteriophages, enzymes, nitric  
46 oxide, Polyzwitterions, Polymeric Coating Modifications, Liposomes. These coating have shown  
47 good antimicrobial activity *in vitro*, however a few drawbacks are shortlisted including resistance  
48 development. Provoked by this defeat, it is significant to develop a promising alternate to

49 antibiotics as silver nanoparticles from phytochemicals as an antimicrobial nanomaterial to inhibit  
50 catheter associate UTI infection.

51 Among the inorganic nanoparticles Silver nanoparticles (AgNPs) considered to be a much  
52 more attention in scientific field due to their functional veracity [9]. Production of nanomaterial  
53 through physical and chemical approaches leads to adverse effect in environment due to adsorption  
54 of toxic substance as a reducing agent. The system of phytochemical mediated synthesis of  
55 nanomaterial is promising eco-friendly, non-toxic, cheap substrate, easy available, convenient and  
56 quick process to fabricate antimicrobial nanomaterial[10, 11]. *C. carandas* belongs to the species  
57 of flowering shrub in dogbane family, Apocyanaceae. *Carissa carandas* spread widely throughout  
58 the tropical and subtropical region of India. The plant possessing phytochemical constituents are  
59 highly imparted to medicinal properties[12].

60 In this research acquisition, leaves of *C. carandas* were used to yield AgNPs and  
61 production was optimized by altering different parameters like pH, *C. carandas* leaf extract, metal  
62 ion, and production time. Characterization of synthesized AgNPs was done by UV Vis  
63 spectrophotometry, TEM, XRD, and EDS. The effect *C. carandas* leaf extract mediated  
64 synthesized AgNPs was investigated for antimicrobial activity and embedded on catheter to  
65 investigate the property as antimicrobial nanomaterial to inhibit catheter associate UTI infection.

## 66 2. Materials and Method

### 67 2.1 Chemicals and Biological materials

68 Fresh leaves of *C. carandas* were collected from Periyakulam, Theni District, Tamilnadu,  
69 India (10.1239° N, 77.5475° E) and washed thoroughly to remove the dust. Silver nitrate (AgNO<sub>3</sub>),  
70 Muller Hinton Agar (MHA), Luria Bertani broth (LB), tryptic soya broth (TS) was acquired from  
71 Hi-media and used to assess antibacterial, antibiofilm assays.

### 72 2.2 Extract preparation

73 Cleaned *C. carandas* leaves were subjected to air dry and quantified the weight of 100  
74 grams. Dried leaves were soaked with 300 mL of Millipore water and allowed to boil for 1 h at  
75 80°C to avail **dikashan** of leaf extract which was percolated through Whatmann no.1 filter paper  
76 and stored at 4 °C for future use.

### 77 **2.3 Synthesis and optimization of AgNPs production**

78 The AgNPs synthesis **protocol as follows**: appropriate amount of filtered *C. carandas* leaf  
79 extracts and 1.25mM of aqueous silver nitrate solution (AgNO<sub>3</sub>) in the ratio of 1:9 **and** incubated at  
80 ambient temperature **in** under dark condition. Initial AgNPs production was confirm by visual color  
81 change from light yellow to dark brown color and **scanning the wavelength of the reaction mixture by**  
82 **UV-Visible Spectrophotometer** (Shimadzu UV 1800, Japan) in wavelength ranges of 200-600 nm. To  
83 achieve large scale production of AgNPs **mostly optimization protocol must be followed by varying**  
84 **the production parameters** like pH 2, 3, 4, 5, 6, 7, 8, 9, 10; Substrate (extract) concentration 0.1, 0.5,  
85 **0.75, 1, 1.25, 1.5, 1.75**; Ag<sup>+</sup> ion 0.25, 0.5, 0.75, 1, 1.25, 1.5, 1.75, 2, 2.25, 2.5mM; and production time  
86 **0, 5, 10, 15, 20, 25, 30** and measured using UV-Visible Spectrophotometer. With the optimized  
87 parameters the optimum production was set for the large-scale production. The **eterogeneous** mixture  
88 was centrifuged at 12000 rpm for 20 min followed by collection of pellets; washed with methanol:  
89 water ratio at 6:4 and lyophilized to obtain nanoparticles powder.

### 90 **2.4 Characterization of Nanoparticles:**

91 XRD (X-ray diffraction) **measurement** of silver nanoparticles was recorded by P analytical  
92 X' Pert PRO powder which was operated at a voltage of 40kV with the current of 30 mA using  
93 Cu-K $\alpha$  radiation of wavelength 115406 Å in the 2 $\theta$  range of 20°- 80° to obtain the crystalline  
94 structure of the AgNPs. Involvement of functional group in synthesis of nanoparticles and capping  
95 material was monitored by **The** FTIR (Fourier Transform Infrared spectrophotometer) **was**  
96 performed to analyze the presence of functional groups of AgNPs and capping phytochemicals

97 using attenuated total reflectance (ATR) mode (Nicolet iS5, Thermo Fisher Scientific Inc.,  
98 Marietta, GA, USA). EDX (Energy dispersive X-ray) analysis was performed to **analysis** the  
99 elemental composition (Tescan VEGA 3SBH with Bruker easy). HR-TEM (High resolution  
100 Transmission Electron microscope) and SAED (selected area Electron Diffraction) pattern were  
101 analyzed (JEOL-2100+, Japan) to examine the size, crystalline structure and surface morphology  
102 of AgNPs.

### 103 **2.5 *Anti-Bacterial activity***

104 ***Escherichia coli* AMB4 (MK788230), *Pseudomonas aeruginosa* AMB5 (clinical sample),**  
105 ***Staphylococcus aureus* AMB6 (Clinical sample) was maintained by Department of Microbiology,**  
106 **Alagappa University, Science campus, Karaikudi, India.**

### 107 **2.6 *Agar well diffusion assay***

108 Each test bacterial strain of 0.5 McFarland standards [13] was swapped on MHA plates  
109 using a sterile swab and well of 8mm width were formed using sterile a well borer under aseptic  
110 condition. Different concentrations of **AgNPs 25, 50, 75, 100, 125µg/mL**, crude leaf extract **(20µl)**,  
111 **AgNO<sub>3</sub> solution (20µl)**, DMSO as a solvent negative control **(20µl)**, and ciprofloxacin **(20µl)** as  
112 positive control for assessment were loaded consequently in the agar wells made in MHA plate  
113 and incubated at 37°C for 24 h. After incubation, zone of inhibition (ZoI) were measured to the  
114 nearest millimeter from end of the well to end of the zone.

### 115 **2.7 *Minimum Inhibitory (MIC) and Minimum Bactericidal Concentration (MBC)***

116 The MIC and MBC was performed to evaluate the efficiency of obtained AgNPs to inhibit  
117 bacterial pathogens and protocol was followed according to the guidance of CLSI. MIC was  
118 performed by 96 microtiter well plate by broth micro dilution method. 10<sup>6</sup>CFU/mL concentration  
119 of bacterial inoculum (10µl) was inoculated with different concentrations of AgNPs **(20, 40, 60,**  
120 **80, 100, 120, 140, and 160µL and** incubated at 37 °C for 24 h. After incubation well plates were

121 recorded by ELISA reader at 590nm to assess its optical density value. MIC was analyzed to  
122 determine the efficacy of appropriate concentration of AgNPs required inhibiting the bacterial  
123 growth. After incubation the titer plates were agitated gently for 10 min and the broth in the well  
124 were plated on MHA plate to find the percent MBC. After 24 h incubation the plates were observed  
125 for the CFU.

## 126 ***2.8 Qualitative assay for biofilm formation***

127 Qualitative assessment of the pathogens biofilm potential was adopted by test tube method  
128 was performed according to [7] Doll et al., 2016. Briefly, Tryptic soy broth was inoculated with  
129 loopfull of midlog phase pathogen and incubated at 37 °C for 24 h. Uninoculated broth was  
130 considered as a control. After 24 h incubation the broth was removed and the test tubes were  
131 washed with sterile Phosphate buffered saline (PBS) of pH of 7.4. The test tubes were dried and  
132 stained with 0.1% crystal violet for 10 min. Surfeit dye was removed by using sterile distilled  
133 water visible formation stained film at the base of the tube indicate the biofilm formation[14].

## 134 ***2.9 Quantitative assay for biofilm formation***

135 Development of static biofilm formation was confirmed by Quantitative assay by microtiter  
136 plate method. Mid-log phase culture was diluted ten times using sterile media. The culture was  
137 transferred to microtiter plate. The plates were incubated at 37 °C for 16h. After incubation,  
138 planktonic cells were removed using PBS (7.2) and dried subsequently the plates were stained by  
139 125µL of 0.1 % CV solution. Dye in the well surface was eliminated using 200µL of 30% glacial  
140 acetic acid, the contents were mixed. The retained contents were transferred to sterile well plate  
141 and this setup was read at 590nm. The test organisms were classified as weakly, moderately  
142 adherent, non-adherent and strongly adherent bacteria based on the criteria ( $OD < OD_c =$  Non  
143 adherent,  $OD_c < OD < 2 \times OD_c =$  weakly adherent,  $2 \times OD_c < OD < 4 \times OD_c =$  moderately adherent,  $4$   
144  $\times OD_c < OD =$  strongly adherent where  $OD_c =$  average OD of negative control [15].

145 **2.10 Coating of AgNPs in Urinary catheter**

146 Urinary Catheter was segmented to 1×1cm. Catheter pieces were entirely dipped in  
147 synthesized AgNPs suspension with 30  $\mu\text{g/ml}$  concentration for 24 h. Excess of suspension was  
148 removed by blotting and dried at 50°C [16].

149 **2.11 Biofilm Inhibition assay**

150 Conical flask containing 25mL of sterile **tryptic** soy broth inoculated with 100  $\mu\text{l}$  of mid-  
151 log phase pathogenic culture. Two sterile catheters were introduced into the medium using sterile  
152 forceps. Different concentration of synthesized AgNPs was added to sterile catheter (20 $\mu\text{l}$ , 40 $\mu\text{l}$ ,  
153 80 $\mu\text{l}$ , 120 $\mu\text{l}$ , 160 $\mu\text{l}$ ). Later, this setup was subjected to incubation for 24h at 37 °C. Sterile broth  
154 was maintained as negative control. Biofilm control was maintained with pathogen in the growth  
155 medium. After incubation, the catheters were removed from broth and transferred into sterile PBS  
156 phosphate buffered saline to get rid of planktonic cells and then the catheter was stained with 0.1%  
157 crystal violet (CV) for 10 min. The catheters were dried and observed under compound  
158 microscope.

159 Staining solutions were made out by mixing 0.05mL of stock solution of 1% Acridine  
160 orange with 5mL of acetate buffer 0.2M (pH4). Sterile catheter was placed with AgNPs treated  
161 and untreated bacterial pathogen and allowed to dried at 50°C, the **cultures** were fixed with absolute  
162 methanol and stained with Acridine orange for 1 min, rinsed with distilled water and dried. The  
163 catheters were observed for fluorescence microscope[17]. The **adherence of** biofilm can be  
164 observed on the surface of the catheter [18].

165 Biofilm was studied by **Quantitative** assessment using microtiter well plate method. 50 $\mu\text{l}$   
166 of TSB diluted with 10 $\mu\text{l}$  of mid-log phase culture was added to the wells. **Different concentration**  
167 **of AgNPs** was added to the respective wells. DMSO acts as a solvent control. The well plates were

168 incubated for 24h at 37 °C [3]. Afterwards the plates were subjected to read the OD value at 590nm  
169 using micro titer plate reader. Conducted experiments were done in triplicate

170 The inhibition percentage was calculated by the formula

$$171 \frac{Ab_c - Ab_l}{Ab_c} \times 100$$

## 172 **2.12 Effect of coating AgNPs on catheter**

173 Effect of synthesized AgNPs on catheter after coating was proved using antimicrobial  
174 assay. Uropathogens were inoculated on the surface of MHA plates. Coated and uncoated catheter  
175 was situated on agar and allowed to incubate at 37 °C for 24 h and zone of inhibition were observed  
176 [19].

## 177 **2.13 SEM analysis**

178 Coated and uncoated catheter pieces were introduced into Tryptic soy broth which is  
179 inoculated with bacterial pathogen, aseptically for 48 h at 37 °C. To analyze SEM, catheter were  
180 fixed with 2.5% of Glutaraldehyde in 0.1M sodium phosphate buffer for 3 hours and washed with  
181 0.1M sodium phosphate buffer. Then sample allow to dehydrate through series of ethanol: 30%,  
182 50%, 80% for 10 min [20, 21].

## 183 **2.14 Synergistic effect of silver nanoparticles with commercial antibiotics**

184 Synergistic effect of silver nanoparticles with commercial antibiotics for uropathogens was  
185 done by disk diffusion method. Synthesized AgNPs were impregnated with commercial disk  
186 (Ciprofloxacin -50mcg, Trimethoprim – 30 mcg, Gentamycin – 30 mcg) in the concentration of  
187 20µg/mL and allow to air dry. MHA plates were prepared and inoculated with overnight bacterial  
188 culture in the turbidity of 0.5% of McFarland standard. Control plates were swabbed with culture  
189 and placed with commercial disks. AgNPs impregnated disks were kept on MHA agar plate  
190 aseptically. The plates were incubated at 37 °C for 24 h and measure the zone of inhibition[20].

## 191 **3. Result**

### 192 **3.1 Production optimization**

193 For the preliminary confirmation of AgNPs production in the reaction mixture through  
194 green process was visual as color change, next to that surface plasmon resonance (SPR) using UV–  
195 visible spectroscopy as a tremendous tool. An intense peak at 410nm was identified by UV–visible  
196 absorption spectra confirms the formation of colloidal AgNPs. Optimum reduction of Ag<sup>+</sup> by *C.*  
197 *carandas* leaf extract to attain maximum AgNPs production are succeeded by changing the pH,  
198 extract concentration, silver ion concentration, and production time and the wavelength were  
199 revealed in Fig. 1 (a,b,c and d). The optimum AgNPs production was found in pH 7 (Fig. 1 (a)),  
200 the AgNPs production was increase when pH increases and then decrease. The lower pH resulted  
201 in the production of larger AgNPs and the particles gets aggregates, which results disappearance of  
202 the broadening of the peak and red shift [22] Fig. 1 shows the UV–vis spectra of  
203 the AgNPs production on 1.25mL of *C. carandas* leaf extract concentrations gave a plasmon  
204 resonance band at 410 nm. However, when increasing the extract concentration to 2mL the  
205  $\lambda_{\max}$  peak get fluctuate. The minor differences in  $\lambda_{\max}$  values indicate variations in particle size due  
206 to varying concentration of *C. carandas* leaf extract. There is no interesting color development or  
207  $\lambda_{\max}$  peak in control *C. carandas* leaf extract or Ag<sup>+</sup>. The AgNPs obtained on changing the  
208 AgNO<sub>3</sub> concentrations from 0.5 mM to 2.5mM in 1.2mL *C. carandas* leaf extract ensued that  
209 concentration of Ag<sup>+</sup> increased,  $\lambda_{\max}$  peak became distinct and color intensity increased in reaction  
210 mixture. Longer wavelength  $\lambda_{\max}$  peak are broad with an absorption tail when concentration of  
211 Ag<sup>+</sup> increases which shown augmentation in size of the particles and color intensity also increase.  
212 The optimum Ag<sup>+</sup> was set at 1.25 mM for the supplementary study and reaction were accepted out  
213 under the above stated condition. The AgNPs production using aqueous leaf extracts of *C.*  
214 *carandas* at different time intravel was studied by measuring  $\lambda_{\max}$ . The absorption peaks were  
215 recorded by aliquots removed for analysis at 0min, 5min, 10 min, 5min, 15 min, 20 min, 25min,



216 and 30 min (Fig. 1(d)). Hence, it is observed from the spectra that the AgNPs SPR peak occurs at  
217 410 nm at 20 min with high absorbance, which is very specific for AgNPs.

## 218 3.2 **Characterization**

### 219 3.2.1 **XRD**

220 XRD pattern was evaluated to resolve width, peak position and peak intensity peaks in  $2\theta$  spectrum  
221 ranging from  $20^\circ$  to  $80^\circ$  as depicted in Fig. 2 (a). Characteristic peaks at 38.01, 44.13, 64.46, 77.40;  
222 Bragg reflections corresponding to 111, 200, 220 and 311 lattice plans of FCC structure (JCPDS  
223 File No. 04-0783) of AgNPs were observed. This pattern shows the crystalline structure of AgNPs,  
224 size of AgNPs was calculated by full width at half-maximum (FWHM) data was used with the  
225 Scherr's formula  $D = \frac{k\lambda}{\beta \cos\theta}$  was estimated to be 25.4 nm. Where  $k$ = constant,  $\lambda$ = X-ray  
226 wavelength,  $\beta$ = angular FWHM,  $\theta$ = Bragg's diffraction angle and  $D$ = crystalline size of diffraction  
227 angle  $\theta$ .

### 228 3.2.2 **FTIR**

229 The FTIR spectrum of AgNPs shows major absorption band around 440.02, 479.57,  
230 548.00, 1104.68, 1383.22, 1443.38, 1621.55, 2921.60, 3419.99 $\text{cm}^{-1}$  and the crude *C. carandas* leaf  
231 extract shows absorption spectra on 780.44, 1105.57, 1315.55, 1386.44, 1443.56, 1617.79,  
232 2922.97, 3421.32 $\text{cm}^{-1}$  depicted in Fig. 2 (b). The peak on 440.02 was due to aryl disulphide  
233 stretches, 479.57 $\text{cm}^{-1}$  was due to polysulphide stretches 548 due to C-I stretches and 1104.68 and  
234 1105.57 were -C-O- stretching vibration of ether 1443.38 and 1443.56 $\text{cm}^{-1}$  were -C=C- aromatic  
235 structures. 1621.55 and 1617.79 were the -C=C- alkene group. Peaks 2921.60, and 2922.97 $\text{cm}^{-1}$   
236 were -CH<sub>3</sub> group and the band on 3419.99 and 3421.32 $\text{cm}^{-1}$  were the normal polymeric stretch  
237 of hydroxyl (OH) group. The absorption band is due to the vibration effect of the alkaloids,  
238 terpenoids and flavonoids present in the plant extract and the plays crucial role in capping and

239 stabilization of AgNPs. The band shift of hydroxyl group in the FTIR spectra confirmed the  
240 binding of Ag<sup>+</sup> to the OH group.

### 241 **3.2.3 EDS**

242 Presence of silver element in synthesized AgNPs was confirmed by Energy Dispersive  
243 analysis (Fig. 2 (c)). Metallic AgNPs shows a typical optical absorption peak at 3KeV. Peaks of  
244 silver element were obtained at 3keV from the particle of *C. carandas* leaf mediated obtained  
245 AgNPs. Few weaker peaks were observed which corresponding to O and C also found.

### 246 **3.2.4 HR-TEM**

247 High resolution Transmission electron microscope determined the morphology, shape and  
248 size of bio fabricated AgNPs as shown in the Fig. 2 (d). TEM micrograph shows that particles are  
249 monodispersed and found to be spherical with the average diameter of approximately 14nm. SAED  
250 pattern shows single particles in agglomeration. This pattern revealed the circular fringes of Face  
251 centered cubic structure of silver was depicted in Fig. 2 (e).

### 252 **3.3 Agar well diffusion assay**

253 Antibacterial activity of synthesized AgNPs was evaluated against Gram positive and  
254 Gram negative uropathogens such as *S. aureus*, *E. coli* and *P. aeruginosa*. The clear zone was  
255 gradually increased based on the dose dependent manner as shown in the Table 1. The well  
256 diffusion assay also performed for comparative study of crude extract, AgNO<sub>3</sub> solution, Standard  
257 antibiotic Ciprofloxacin (50µg/mL), AgNPs, DMSO as a solvent as shown in Fig. 3 and these  
258 results were depicted in the Table 1.

### 259 **3.4 MIC and MBC**

260 MIC and MBC are performed to identify the lowest concentration of the compound. The  
261 results of MIC and MBC of AgNPs against uropathogens were depicted on Fig. 4. The synthesized  
262 AgNPs shows activity against uropathogens. The value of MIC and MBC of *S. aureus* was

263 40mg/mL, *E.coli* was 60mg/mL and for *P. aeruginosa* value was 40mg/ml. MBC results against  
264 uropathogens shows bactericidal activity of AgNPs.

### 265 **3.5 Bacterial biofilm potential**

266 In our study, the biofilm forming ability was verified by test tube method. The test tube  
267 base contains the adhered layer of uropathogens. *P. aeruginosa* forms a strong biofilm mat than  
268 other organism. The biofilms were analyzed quantitatively to check the potential biofilm formers,  
269 *P. aeruginosa* shows  $OD_C (0.1784) < OD (3.045)$  however *S. aureus* also produce strongly  
270 adherent biofilm layer  $OD_C (0.1784) < OD (3.1074)$ , *E. coli* shows an  $OD_C (0.1784) < OD (3.012)$   
271 confirms that it is a strong biofilm formers.

### 272 **3.6 Biofilm Inhibition**

273 Synthesized AgNPs exposed the anti-biofilm activity against the uropathogens.  
274 Uropathogens adhered to the catheter which is treated with different concentration of AgNPs  
275 subjected to microscopic analysis. Under microscopic observation tightly adhered cells are  
276 gradually dispersed depends upon the concentration of NPs compare with control which shows the  
277 adhered mat formation as shown in Fig. 5. Viability and disruption of biofilm mat after AgNPs  
278 treatment analyzed by fluorescence microscopy shows that abruption of biofilm on coated  
279 catheters as shown in Fig. 6 and dense biofilm mat on uncoated one using acridine orange staining  
280 method. In quantitative assay, highest concentration of NPs shows the highest level of inhibition.  
281 The inhibition of *Pseudomonas aeruginosa*  $85.8 \pm 1.450\%$  was slightly higher than the *S. aureus*  
282  $82.8 \pm 1.83\%$  whereas the reduction of *E.coli*  $71.4 \pm 1.25\%$ . Percentage oh inhibition was  
283 calculated and shown in Fig. 7.

### 284 **3.7 Coating of AgNPs in Urinary catheter**

285 Evaluations of anti-biofilm potential of uropathogens were tested by the embedding of  
286 urinary catheters with or without AgNPs as a comparison to uncoated catheter as shown in Fig. 8.

287 The 30 $\mu$ g/mL of AgNPs coated catheter exhibits anti-biofilm activity with the value of 18 $\pm$ 0.4,  
288 21 $\pm$ 0.3, and 23 $\pm$ 0.1 for *S. aureus*, *E.coli*, and *P. aeruginosa*, respectively. The characterization of  
289 biofilm formation by both light and fluorescence microscopic analysis revealed the dense mat  
290 formation on untreated and disruption of biofilm in the treated catheter. Urinary catheter  
291 impregnated with AgNPs shows ZOI against uropathogens whereas uncoated shows no zone of  
292 inhibition (Table 2).

### 293 3.8 SEM

294 SEM analysis was performed on coated and uncoated catheters that had been treated and untreated  
295 with biofilm former. The uncoated with bacterial treated catheter shows dense biofilm formation.  
296 Coated that had been treated, catheters shows disruption of biofilm mat. Incorporation of  
297 synthesized AgNPs with biomedical devices provide better compatibility depicted in Fig.9

### 298 3.9 Synergistic effect of AgNPs with commercial antibiotic

299 This method was performed to increase the efficacy of the antibiotic with combined effect  
300 of NPs using disk diffusion method. Zone of inhibition of commercial antibiotic and synthesized  
301 AgNPs are depicted in Table 3.

### 302 3.10 Mechanism of antibacterial and antibiofilm of AgNPs

303 According to this study, AgNPs has tremendous advantages over inhibiting or destroying  
304 multiple drug-resistant strains acting as potential antibacterial and on arresting biofilm formation  
305 [23]. While the antibacterial and antibiofilm mechanisms of AgNPs have been discussed widely,  
306 however the exact mechanism of AgNPs is still under indefinite and the finding limited upon ion  
307 mediated and contact inhibition. In this study, precise antibacterial (Fig. 10) and antibiofilm (Fig.  
308 11) mechanism of AgNPs was discussed as proposed.

## 309 4. Discussions

310 Uropathogens are the major cause of UTI with their biofilm formation. These uropathogens  
311 are notorious and perpetuating. They become combat against wide range of antibiotics and  
312 environmental stress such host immune response. They are difficult to treat and eradicate[24]. The  
313 major toughness of biofilm is its architecture EPS, quorum sensing (QS) activity. The over  
314 production of EPS leads to resistant against antibiotic and another crucial factor is QS  
315 (construction of wild type architecture) it increase the stability against oxidative and osmotic  
316 stresses of biocide [25] Milan et al.[26] states that nosocomial acquired UTI shows high level of  
317 resistant than community acquired UTI show the patient indwelling catheters shows high risk of  
318 UTI. Due to its biocompatibility and backdrop of antimicrobial resistant create the thirst of seeking  
319 naive therapeutic despite of antibiotic[27]. The plant derived drug compiled with nanotechnology  
320 wrap out resistant against Uropathogens. In this present study, *C. carandas* leaf was subjected to  
321 nanoparticle synthesis with potent antibacterial and antibiofilm prospective. The choice of green  
322 synthesis of NPs was due to their capping capability and stability. Biosynthesized NPs are facile;  
323 cost of effective, fast, non-toxic, possessing well defined morphology and uniformity in size [28].  
324 The enhancement of the functional group due to their binding of  $Ag^+$  leads to efficient  
325 antimicrobial activity. Fig.1 (a-d) demonstrates the absorption spectra of SPR for the optimization  
326 of AgNPs synthesis under distinct parameters viz. pH, crude concentration,  $Ag^+$  and incubation  
327 time. These results provide for evaluating the reaction parameter and optimized conditions for NPs  
328 synthesis [29] Ibrahim [30] stated that, reaction mixture color and SPR intensity which are pH  
329 dependent. In our study, acidic and alkaline pH doesn't increase the SPR intensity which provides  
330 the unfavorable condition. The neutral pH typically increased the intensity and provide favorable  
331 environment. Crude concentration is noteworthy due to their phytochemical stabilizing agents. The  
332 raising of absorption band was noticed in in 1.25ml of extract concentration. Whereas the addition  
333 of higher crude concentration lead to decreased absorbance peak [31]. The absorption peaks were

334 gradually increased with the increased metal concentration which may be attributed by  
335 longitudinal vibrations [32]. Plenteous production of AgNPs was attained by these providing the  
336 optimized reaction parameter. The color change of the heterogeneous reaction mixture observed  
337 at 410nm due to their electron excitation similar observation [33]. The FTIR analysis speaks the  
338 stretch band and bond of AgNPs, the presence of potential biomolecules with Ag attachment leads  
339 stabilization and capping[3, 13]. Due to their surface adhered potential biomolecules, green  
340 mediated AgNPs shows the higher anti-bacterial and anti-biofilm activity [34]. The size and shape  
341 of AgNPs plays a major role in bactericidal activity [35]. XRD analysis revealed the crystalline  
342 nature of AgNPs presence of silver confirmed by peak determination. These XRD patterns  
343 reported in earlier studies saratale et al. [36] was accordance with our results. EDX profile  
344 outcomes exhibits the strong signal for silver approximately at 3KeV due to the SPR which is  
345 identical to Ramar et al. [37] and Magudapathy et al. [38]for the production of leaf extract mediated  
346 synthesis AgNPs. The structure and size of NPs were concluded as spherical and uniformity in  
347 size was confirmed by HR-TEM analysis. To authenticate the crystalline nature of AgNPs by  
348 SAED pattern as per the bright circular ring for the Fcc indicates the AgNPs. During recent years,  
349 undesirable consequence effect of catheter related UTI infections lead to the increased mortality  
350 [39]. Application of AgNPs shows the efficient activity against antimicrobial and that are  
351 justifiable tool for evading indwelling catheter related infections. Medically implantable devices  
352 coated with AgNPs which are requisite factor for evading the bacterial adherence and  
353 agglomeration of biofilm[40] in this investigation reported that, *E. coli* (71.4%), *S. aureus*  
354 (82.8%), *P. aeruginosa* (85.8%) theses nosocomial clinical pathogens are prevalence in formation  
355 of biofilm. Thesis results were similar to Sharma et al.[41] and Kamarudheen and Rao [42]. The  
356 AgNPs embedded catheter shows antimicrobial activity against uropathogens which may due to  
357 their size and inhibition capacity that makes the drug resistant uropathogens susceptible [43]. The

358 coating of AgNPs with commercial catheter (Foley Balloon catheter) creates the efficiency against  
359 the UTI. AgNPs shows interaction with bacterial membrane, protein intracellular proteins, and  
360 phosphate residues in DNA and to interfere with the cell division leads to cell death[44]. And also  
361 it cause oxidative damage leads to protection of reactive oxygen species (ROS) that is free  
362 radicals[45]. The AgNPs reduces the encrustation of obstinate biofilm and ruptures and  
363 disintegrate the biofilm mat and shows bactericidal activity against Uropathogens. The coated  
364 catheter shows antibacterial, anti-EPS and anti-quorum sensing activity of uropathogens and end  
365 up the pathogens into avirulent and disrupt the architecture [46]. Fluorescent microscopy shows  
366 the biofilm aggregation in uncoated catheter whereas biofilm destruction in coated catheter both  
367 is treated by respective biofilm former organism. Differentiation of live and dead cells was  
368 exhibited by fluorescents with intercalation of Acridine orange[47]. They are responsible for the  
369 anti-cancer, anti-oxidant, anti-microbial activity. The *In vitro* studies show efficient result against  
370 Uropathogens by using coated catheters. Scanning Electron Microscopy was employed to identify  
371 the biofilm formation and destruction in surface modified and unmodified catheters using AgNPs  
372 exposed with uropathogens. Biofilm formation and disruption employed with Scanning Electron  
373 Microscopy using surface modified with AgNPs and unmodified catheters treated with  
374 uropathogens.

375 The AgNPs have tremendous advantage for biological applications over the bulk metal  
376 owing to it size that enables the NPs to facilitate to anchor in to the micro cell (bacteria)  
377 components [48]. The anchored AgNPs cause physical damage to the cell components leads to  
378 killing of bacteria (Fig. 10). There is a phenomenon that the effect of AgNPs on Gram positive  
379 bacteria is less than gram negative bacteria due to the composition of cell wall components and  
380 AgNPs charges [49]. The charges in the cell can facilitate the attraction of AgNPs for attachment  
381 on to the cell membrane [50]. The killing of bacteria directed through several phenomenon like

382 penetration of AgNPs in to membrane, surface area in contact, reach cytoplasm, ribosomes,  
383 interaction with cellular structures and biomolecules by several process[23]. Moreover, production  
384 free radical and high levels of reactive oxygen species (ROS) are also a precise mechanism of  
385 AgNPs to inhibit bacterial by apoptosis and DNA damage [51].

386 The solid surface provides a strong anchoring habitation for bacteria to form biofilm,  
387 similarly biofilm is formed on the surface of implant device, which protect the bacteria from  
388 antibiotic action and cause several infections[52]. Earlier, several reports on antibiofilm activity  
389 of AgNPs against several bacteria was reported[49] [53, 54], among all AgNPs interaction with  
390 *Pseudomonas putida* resulted as an innovative finding to arrest biofilm[49, 53, 54]. Additionally,  
391 functionalized, immobilized and surface modified AgNPs embedded on surface of implants are  
392 inhibiting bacterial adhesion and *icaAD* transcription in implants[49]. Hence, overall mechanism  
393 proposed that phytochemical mediated synthesized AgNPs will open a new avenue to use as  
394 antibacterial and antibiofilm candidate after embedding in to implants.

## 395 5. Conclusion

396 In this work, a methodical procedure was intended to interpret the augmented antibacterial  
397 and antibiofilm effects of AgNPs as antibiotic with appropriate control. Subsequently, AgNPs was  
398 synthesized using an ecofriendly, approach using cheap, easily available substrate supernatant  
399 of *C. carandas* leaf extract. Synthesized AgNPs were then characterized using several instrumental  
400 techniques and found that obtained AgNPs were with multiple morphology in size between  
401 5~10 nm. Additionally, the antibacterial activity of the selected antibiotics was increased in the  
402 presence of AgNPs against test strains. The *in vitro* study of coated catheters shows efficient anti-  
403 biofilm and antibacterial efficacy. These results might afford a probable mechanism for the  
404 synergistic or augmented effects of antibiotics and AgNPs. The biomaterial coating acts as a



405 preventive shield against uropathogens and it is long lasting, feasible technique and it act as  
406 promising treatment for UTI and nosocomial infections.

#### 407 **Conflicts of interest**

408 The authors have no conflicts of interest to declare. All co-authors have seen and agree with the  
409 contents of the manuscript and there is no financial interest to report.

#### 410 **Authors Contributions**

411 PV came up with the idea and participated in the design, preparation of AgNPs, and writing of the  
412 manuscript. HBHR performed the characterization of nanoparticles. RD participated in culturing,  
413 antibacterial activity, anti-biofilm activity, and other biochemical assays. TS, SM and RP  
414 participated in the coordination of this study. All authors read and approved the final manuscript.

#### 415 **Acknowledgements**

416 The authors thank the Vice-Chancellor and Registrar of Alagappa University for providing the  
417 research facilities.

418

#### 419 **Reference:**

420 [1] Foxman B. Epidemiology of urinary tract infections: incidence, morbidity, and economic costs.  
421 The American journal of medicine. 2002;113:5-13.

422 [2] Nicolle LE, Yoshikawa TT. Urinary tract infection in long-term-care facility residents. Clinical  
423 infectious diseases. 2000;31:757-61.

424 [3] Divya M, Kiran GS, Hassan S, Selvin J. Biogenic synthesis and effect of silver nanoparticles  
425 (AgNPs) to combat catheter-related urinary tract infections. Biocatalysis and agricultural  
426 biotechnology. 2019;18:101037.

- 427 [4] Sileika TS, Kim H-D, Maniak P, Messersmith PB. Antibacterial performance of  
428 polydopamine-modified polymer surfaces containing passive and active components. ACS applied  
429 materials & interfaces. 2011;3:4602-10.
- 430 [5] Siddiq DM, Darouiche RO. New strategies to prevent catheter-associated urinary tract  
431 infections. Nature Reviews Urology. 2012;9:305-14.
- 432 [6] Warren JW. Catheter-associated urinary tract infections. Infectious disease clinics of North  
433 America. 1997;11:609-22.
- 434 [7] Doll K, Jongstaphongpun KL, Stumpp NS, Winkel A, Stiesch M. Quantifying implant-  
435 associated biofilms: Comparison of microscopic, microbiologic and biochemical methods. Journal  
436 of microbiological methods. 2016;130:61-8.
- 437 [8] Singha P, Locklin J, Handa H. A review of the recent advances in antimicrobial coatings for  
438 urinary catheters. Acta biomaterialia. 2017;50:20-40.
- 439 [9] Geetha AR, George E, Srinivasan A, Shaik J. Optimization of green synthesis of silver  
440 nanoparticles from leaf extracts of *Pimenta dioica* (Allspice). The Scientific World Journal.  
441 2013;2013.
- 442 [10] Devi JS, Bhimba BV, Ratnam K. In vitro anticancer activity of silver nanoparticles  
443 synthesized using the extract of *Gelidiella* sp. Int J Pharm Pharm Sci. 2012;4:710-5.
- 444 [11] Rai M, Ingle AP, Gade A, Duran N. Synthesis of silver nanoparticles by *Phoma gardeniae*  
445 and in vitro evaluation of their efficacy against human disease- causing bacteria and fungi. IET  
446 nanobiotechnology. 2015;9:71-5.
- 447 [12] Morton JF. Fruits of warm climates: JF Morton; 1987.
- 448 [13] Kora AJ, Sashidhar R, Arunachalam J. Gum kondagogu (*Cochlospermum gossypium*): a  
449 template for the green synthesis and stabilization of silver nanoparticles with antibacterial  
450 application. Carbohydrate Polymers. 2010;82:670-9.

451 [14] Christensen GD, Simpson WA, Younger J, Baddour L, Barrett F, Melton D, et al. Adherence  
452 of coagulase-negative staphylococci to plastic tissue culture plates: a quantitative model for the  
453 adherence of staphylococci to medical devices. *Journal of clinical microbiology*. 1985;22:996-  
454 1006.

455 [15] Saxena S, Banerjee G, Garg R, Singh M. Comparative study of biofilm formation in  
456 *Pseudomonas aeruginosa* isolates from patients of lower respiratory tract infection. *Journal of*  
457 *clinical and diagnostic research: JCDR*. 2014;8:DC09.

458 [16] Thomas R, Soumya K, Mathew J, Radhakrishnan E. Inhibitory effect of silver nanoparticle  
459 fabricated urinary catheter on colonization efficiency of Coagulase Negative Staphylococci.  
460 *Journal of Photochemistry and Photobiology B: Biology*. 2015;149:68-77.

461 [17] Merritt JH, Kadouri DE, O'Toole GA. Growing and analyzing static biofilms. *Current*  
462 *protocols in microbiology*. 2006:1B. .-B. .17.

463 [18] Cady NC, McKean KA, Behnke J, Kubec R, Mosier AP, Kasper SH, et al. Inhibition of  
464 biofilm formation, quorum sensing and infection in *Pseudomonas aeruginosa* by natural products-  
465 inspired organosulfur compounds. *PLoS One*. 2012;7:e38492.

466 [19] Dhas TS, Kumar VG, Karthick V, Angel KJ, Govindaraju K. Facile synthesis of silver  
467 chloride nanoparticles using marine alga and its antibacterial efficacy. *Spectrochimica Acta Part*  
468 *A: Molecular and Biomolecular Spectroscopy*. 2014;120:416-20.

469 [20] Agarwala M, Barman T, Gogoi D, Choudhury B, Pal AR, Yadav R. Highly effective  
470 antibiofilm coating of silver–polymer nanocomposite on polymeric medical devices deposited by  
471 one step plasma process. *Journal of Biomedical Materials Research Part B: Applied Biomaterials*.  
472 2014;102:1223-35.

473 [21] Djeribi R, Bouchloukh W, Jouenne T, Mena B. Characterization of bacterial biofilms formed  
474 on urinary catheters. *American journal of infection control*. 2012;40:854-9.

475 [22] Yun'an Qing LC, Li R, Liu G, Zhang Y, Tang X, Wang J, et al. Potential antibacterial  
476 mechanism of silver nanoparticles and the optimization of orthopedic implants by advanced  
477 modification technologies. *International journal of nanomedicine*. 2018;13:3311.

478 [23] Lee SH, Jun B-H. Silver nanoparticles: synthesis and application for nanomedicine.  
479 *International journal of molecular sciences*. 2019;20:865.

480 [24] Høiby N, Ciofu O, Bjarnsholt T. *Pseudomonas aeruginosa* biofilms in cystic fibrosis. *Future*  
481 *microbiology*. 2010;5:1663-74.

482 [25] Wai SN, Mizunoe Y, Takade A, Kawabata S-I, Yoshida S-I. *Vibrio cholerae* O1 strain TSI-4  
483 produces the exopolysaccharide materials that determine colony morphology, stress resistance,  
484 and biofilm formation. *Applied and environmental microbiology*. 1998;64:3648-55.

485 [26] Milan PB, Ivan IM. Catheter-associated and nosocomial urinary tract infections: antibiotic  
486 resistance and influence on commonly used antimicrobial therapy. *International urology and*  
487 *nephrology*. 2009;41:461.

488 [27] Gurunathan S, Park JH, Han JW, Kim J-H. Comparative assessment of the apoptotic potential  
489 of silver nanoparticles synthesized by *Bacillus tequilensis* and *Calocybe indica* in MDA-MB-231  
490 human breast cancer cells: targeting p53 for anticancer therapy. *International journal of*  
491 *nanomedicine*. 2015;10:4203.

492 [28] Ahmed S, Ahmad M, Swami BL, Ikram S. A review on plants extract mediated synthesis of  
493 silver nanoparticles for antimicrobial applications: a green expertise. *Journal of advanced research*.  
494 2016;7:17-28.

495 [29] Ahmed S, Saifullah, Ahmad M, Swami BL, Ikram S. Green synthesis of silver nanoparticles  
496 using *Azadirachta indica* aqueous leaf extract. *Journal of radiation research and applied sciences*.  
497 2016;9:1-7.

498 [30] Ibrahim HM. Green synthesis and characterization of silver nanoparticles using banana peel  
499 extract and their antimicrobial activity against representative microorganisms. *Journal of*  
500 *Radiation Research and Applied Sciences*. 2015;8:265-75.

501 [31] Kalpana D, Han JH, Park WS, Lee SM, Wahab R, Lee YS. Green biosynthesis of silver  
502 nanoparticles using *Torreya nucifera* and their antibacterial activity. *Arabian Journal of Chemistry*.  
503 2019;12:1722-32.

504 [32] Prathna T, Chandrasekaran N, Raichur AM, Mukherjee A. Biomimetic synthesis of silver  
505 nanoparticles by *Citrus limon* (lemon) aqueous extract and theoretical prediction of particle size.  
506 *Colloids and Surfaces B: Biointerfaces*. 2011;82:152-9.

507 [33] Medda S, Hajra A, Dey U, Bose P, Mondal NK. Biosynthesis of silver nanoparticles from  
508 *Aloe vera* leaf extract and antifungal activity against *Rhizopus* sp. and *Aspergillus* sp. *Applied*  
509 *Nanoscience*. 2015;5:875-80.

510 [34] Singh P, Kim Y-J, Zhang D, Yang D-C. Biological synthesis of nanoparticles from plants and  
511 microorganisms. *Trends in biotechnology*. 2016;34:588-99.

512 [35] Leuck A-M, Johnson JR, Hunt MA, Dhody K, Kazempour K, Ferrieri P, et al. Safety and  
513 efficacy of a novel silver-impregnated urinary catheter system for preventing catheter-associated  
514 bacteriuria: a pilot randomized clinical trial. *American journal of infection control*. 2015;43:260-  
515 5.

516 [36] Saratale RG, Benelli G, Kumar G, Kim DS, Saratale GD. Bio-fabrication of silver  
517 nanoparticles using the leaf extract of an ancient herbal medicine, dandelion (*Taraxacum*  
518 *officinale*), evaluation of their antioxidant, anticancer potential, and antimicrobial activity against  
519 phytopathogens. *Environmental Science and Pollution Research*. 2018;25:10392-406.

520 [37] Ramar M, Manikandan B, Marimuthu PN, Raman T, Mahalingam A, Subramanian P, et al.  
521 Synthesis of silver nanoparticles using *Solanum trilobatum* fruits extract and its antibacterial,

522 cytotoxic activity against human breast cancer cell line MCF 7. *Spectrochimica Acta Part A:*  
523 *Molecular and Biomolecular Spectroscopy.* 2015;140:223-8.

524 [38] Magudapathy P, Gangopadhyay P, Panigrahi B, Nair K, Dhara S. Electrical transport studies  
525 of Ag nanoclusters embedded in glass matrix. *Physica B: Condensed Matter.* 2001;299:142-6.

526 [39] Nicolle LE. Urinary catheter-associated infections. *Infectious Disease Clinics.* 2012;26:13-  
527 27.

528 [40] Morones JR, Elechiguerra JL, Camacho A, Holt K, Kouri JB, Ramírez JT, et al. The  
529 bactericidal effect of silver nanoparticles. *Nanotechnology.* 2005;16:2346.

530 [41] Sharma M, Yadav S, Chaudhary U. Biofilm production in uropathogenic *Escherichia coli.*  
531 *Indian Journal of Pathology and Microbiology.* 2009;52:294.

532 [42] Kamarudheen N, Rao KB. Fatty acyl compounds from marine *Streptomyces griseoincarnatus*  
533 strain HK12 against two major bio-film forming nosocomial pathogens; an in vitro and in silico  
534 approach. *Microbial pathogenesis.* 2019;127:121-30.

535 [43] Li W-R, Xie X-B, Shi Q-S, Zeng H-Y, You-Sheng O-Y, Chen Y-B. Antibacterial activity and  
536 mechanism of silver nanoparticles on *Escherichia coli.* *Applied microbiology and biotechnology.*  
537 2010;85:1115-22.

538 [44] Sondi I, Salopek-Sondi B. Silver nanoparticles as antimicrobial agent: a case study on *E. coli*  
539 as a model for Gram-negative bacteria. *Journal of colloid and interface science.* 2004;275:177-82.

540 [45] Kim JS, Kuk E, Yu KN, Kim J-H, Park SJ, Lee HJ, et al. Antimicrobial effects of silver  
541 nanoparticles. *Nanomedicine: Nanotechnology, Biology and Medicine.* 2007;3:95-101.

542 [46] Maharjan G, Khadka P, Siddhi Shilpakar G, Chapagain G, Dhungana GR. Catheter-associated  
543 urinary tract infection and obstinate biofilm producers. *Canadian Journal of Infectious Diseases*  
544 *and Medical Microbiology.* 2018;2018.

545 [47] Manikandan M, Wu H-F. Rapid differentiation and quantification of live/dead cancer cells  
546 using differential photochemical behavior of acridine orange. *Photochemical & Photobiological*  
547 *Sciences*. 2013;12:1921-6.

548 [48] Slavin YN, Asnis J, Häfeli UO, Bach H. Metal nanoparticles: understanding the mechanisms  
549 behind antibacterial activity. *Journal of nanobiotechnology*. 2017;15:1-20.

550 [49] Dakal TC, Kumar A, Majumdar RS, Yadav V. Mechanistic basis of antimicrobial actions of  
551 silver nanoparticles. *Frontiers in microbiology*. 2016;7:1831.

552 [50] Farah MA, Ali MA, Chen S-M, Li Y, Al-Hemaid FM, Abou-Tarboush FM, et al. Silver  
553 nanoparticles synthesized from *Adenium obesum* leaf extract induced DNA damage, apoptosis  
554 and autophagy via generation of reactive oxygen species. *Colloids and Surfaces B: Biointerfaces*.  
555 2016;141:158-69.

556 [51] Khatoon Z, McTiernan CD, Suuronen EJ, Mah T-F, Alarcon EI. Bacterial biofilm formation  
557 on implantable devices and approaches to its treatment and prevention. *Heliyon*. 2018;4:e01067.

558 [52] Gurunathan S, Han JW, Kwon D-N, Kim J-H. Enhanced antibacterial and anti-biofilm  
559 activities of silver nanoparticles against Gram-negative and Gram-positive bacteria. *Nanoscale*  
560 *research letters*. 2014;9:1-17.

561 [53] Mohanta YK, Biswas K, Jena SK, Hashem A, Abd\_Allah EF, Mohanta TK. Anti-biofilm and  
562 antibacterial activities of silver nanoparticles synthesized by the reducing activity of  
563 phytoconstituents present in the Indian medicinal plants. *Frontiers in Microbiology*. 2020;11.

564 [54] Rodríguez-Serrano C, Guzmán-Moreno J, Ángeles-Chávez C, Rodríguez-González V,  
565 Ortega-Sigala JJ, Ramírez-Santoyo RM, et al. Biosynthesis of silver nanoparticles by *Fusarium*  
566 *scirpi* and its potential as antimicrobial agent against uropathogenic *Escherichia coli* biofilms. *Plos*  
567 *one*. 2020;15:e0230275.

568

569 **Figure legends**

570 **Figure 1.** UV – vis spectra of Aqueous AgNO<sub>3</sub> with *Carissa carandas* leaf extract at different pH  
571 with different substrate concentration and Different Ag<sup>+</sup> concentration at different time intervals.

572 **Figure 2.** (a). XRD patters of AgNPs synthesized from *Carissa carandas*, (b) FTIR spectra of  
573 *Carissa carandas* and AgNPs, (c) EDS analysis of AgNPs demonstrating the characteristic peaks,  
574 (d) TEM microscopic images of AgNPs,(e) SAED pattern of synthesized AgNPs.

575 **Figure 3.** Zone of Inhibition observed (mm) with different concentration of AgNPs and compared  
576 with Crude extract, DMSO, Commercial ab. AgNO<sub>3</sub> solution with AgNPs.

577 **Figure 4.** Minimum inhibitory concentration (MIC) of synthesized AgNPs

578 **Figure 5.** Light microscopic image of treated and untreated bacterial pathogens (a,c,e) shows  
579 untreated biofilm formed by *Escherichia coli* AMB4, *Pseudomonas aeruginosa* AMB5,  
580 *Staphylococcus aureus* AMB6, (b,d,f) shows synthesized AgNPs treated biofilm formed on  
581 catheter by the pathogens

582 **Figure 6.** Fluorescence microscopic image of treated and untreated bacterial pathogens (a,c,e)  
583 shows untreated biofilm formed by *Escherichia coli* AMB4, *Pseudomonas aeruginosa* AMB5,  
584 *Staphylococcus aureus* AMB6, (b,d,f) shows synthesized AgNPs treated biofilm formed on  
585 catheter by the test pathogens

586 **Figure 7.** Biofilm Inhibition Percentage of pathogens by synthesized AgNPs

587 **Figure 8.** Coated and uncoated catheter by synthesized AgNPs.

588 **Figure 9.** SEM images of the catheter with and without the synthesized AgNPs A) Uncoated; B)  
589 AgNPs coated; C) Uncoated treated; D) Coated treated.

590 **Figure 10.** Proposed mechanism of Antibacterial activity of *Carissa carandas* mediated synthesis  
591 of AgNPs.

592 **Figure 11.** Proposed biofilm mechanism of *Carissa carandas* mediated synthesized AgNPs



593

594

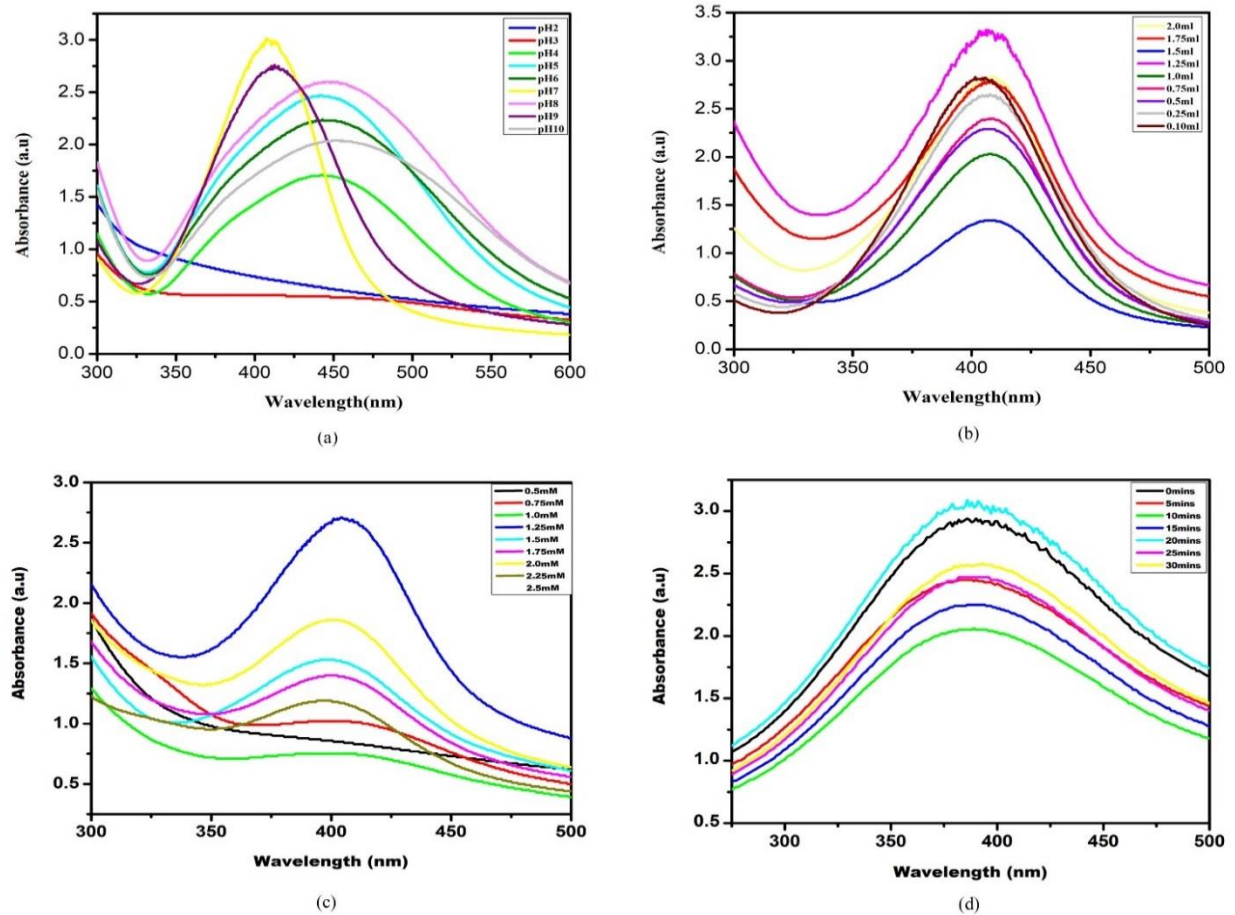

**Figure.1. UV – vis spectra of Aqueous AgNO<sub>3</sub> with *Carissa carandas* leaf extract at (a)different pH with (b) different substrate concentration and (c) different Ag<sup>+</sup> concentration at (d) different time intervals.**

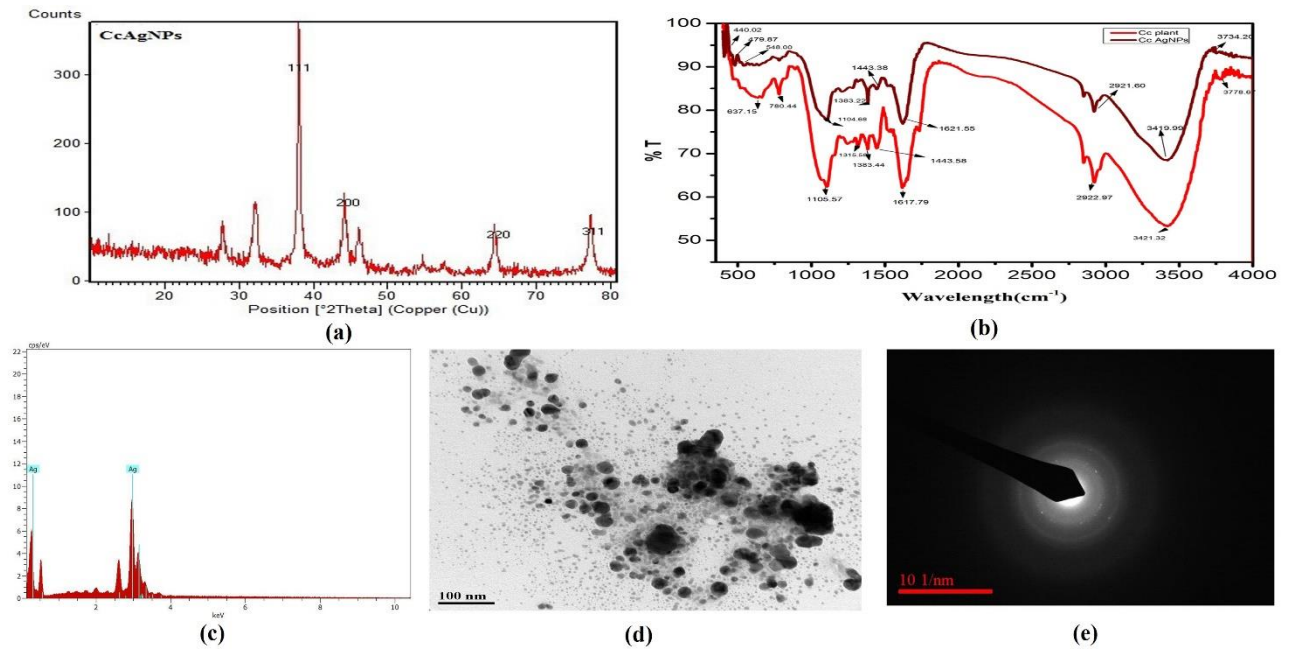

**Figure 2. (a). XRD patterns of AgNPs synthesized from *Carissa carandas*, (b) FTIR spectra of *Carissa carandas* and AgNPs, (c) EDS analysis of AgNPs demonstrating the characteristic peaks, (d) TEM microscopic images of AgNPs, (e) SAED pattern of synthesized AgNPs.**

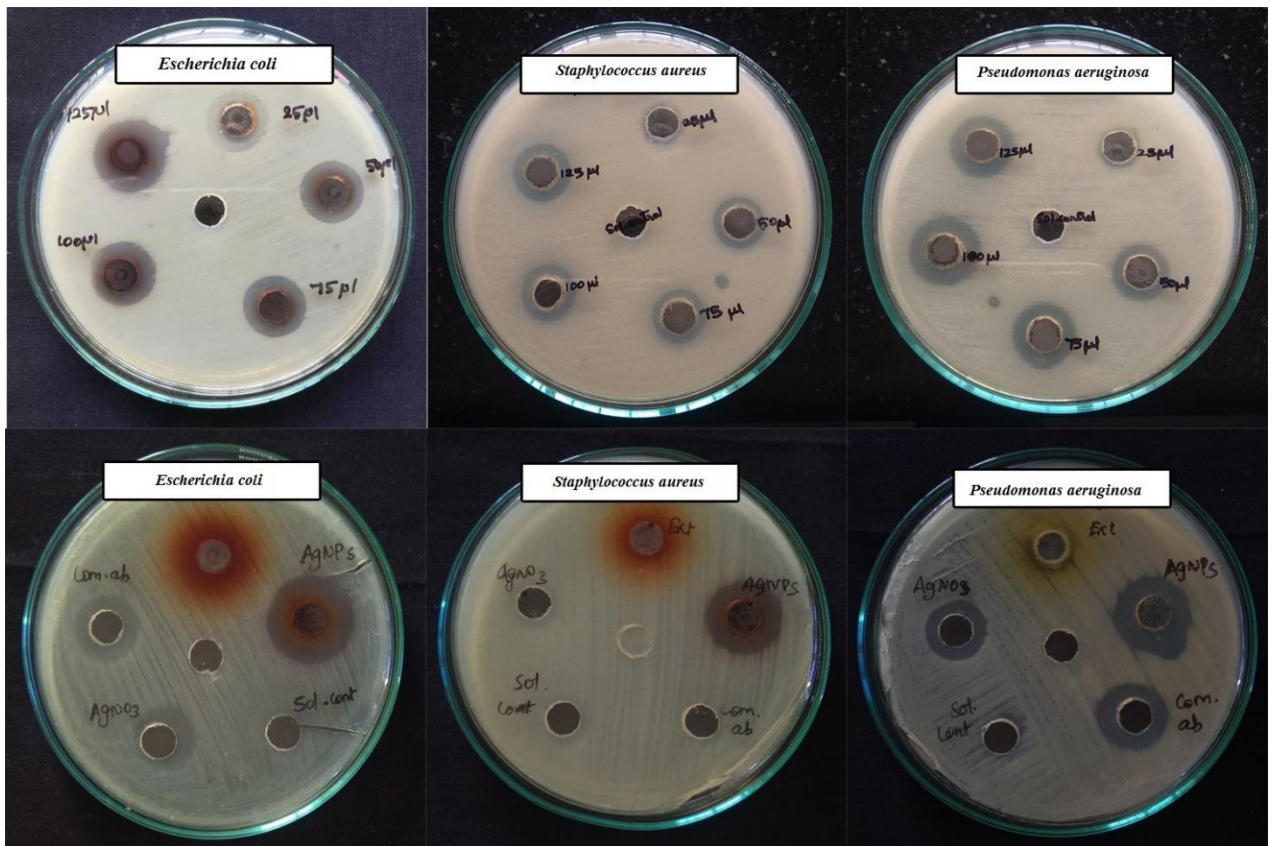

**Figure 3. Zone of Inhibition observed (mm) with different concentration of AgNPs and compared with Crude extract, DMSO, Commercial ab. AgNO<sub>3</sub> solution with AgNPs.**

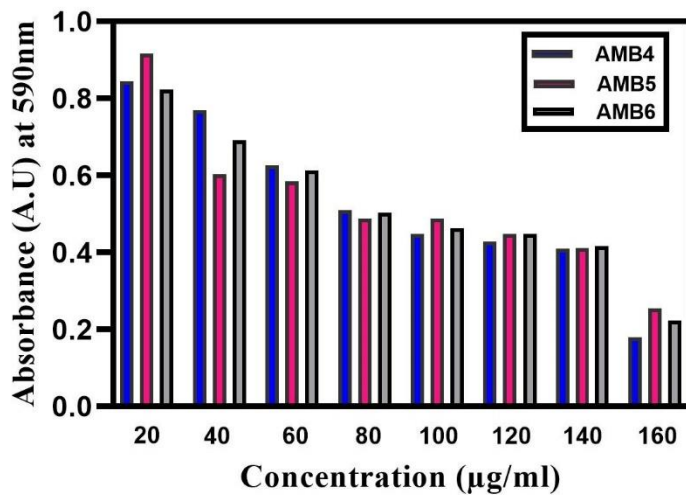

**Figure 4. Minimum inhibitory concentration (MIC) of synthesized AgNPs**



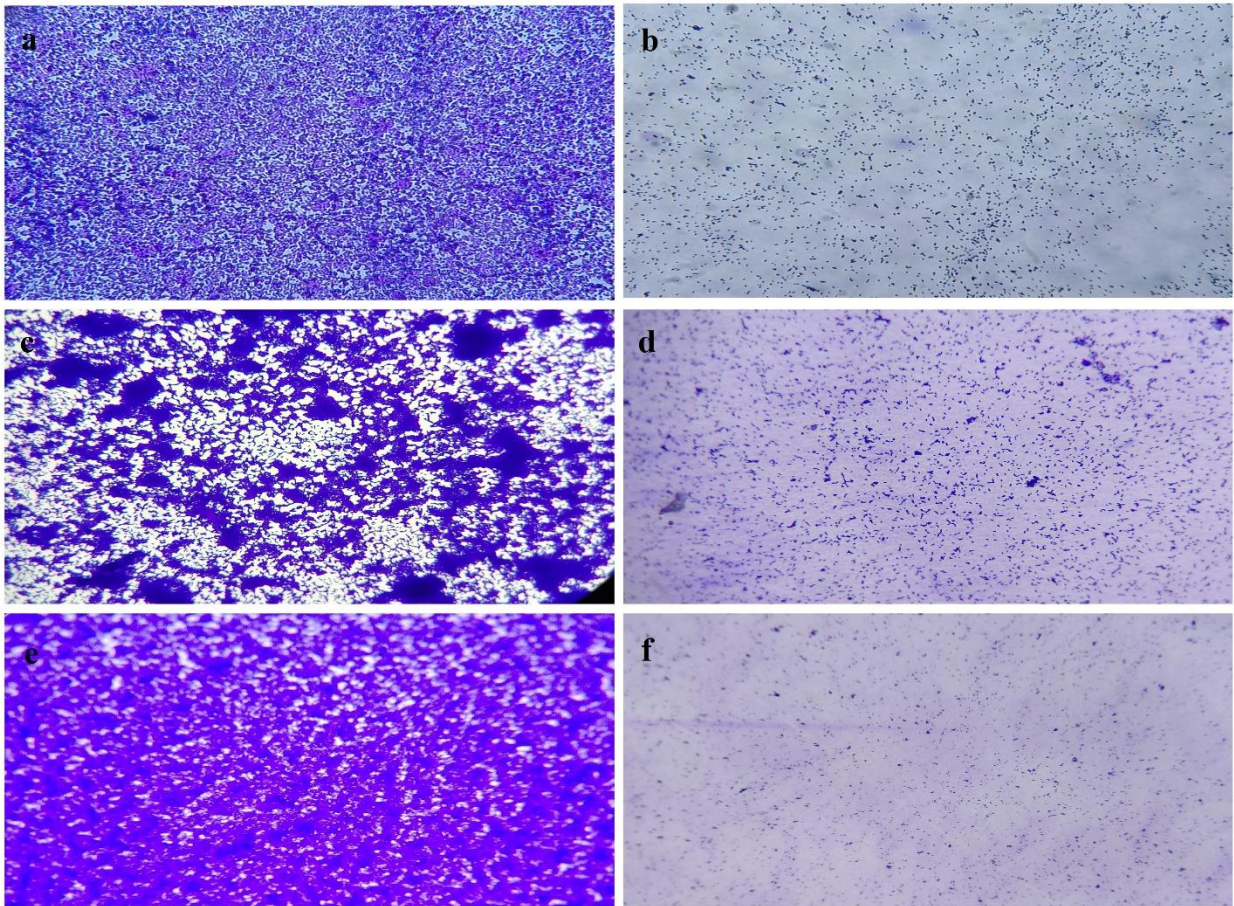

Figure 5. **Light microscopic image of treated and untreated bacterial pathogens (a,c,e)** shows untreated biofilm formed by *Escherichia coli* AMB4, *Pseudomonas aeruginosa* AMB5, *Staphylococcus aureus* AMB6, (b,d,f) shows synthesized AgNPs treated biofilm formed on catheter by the pathogens

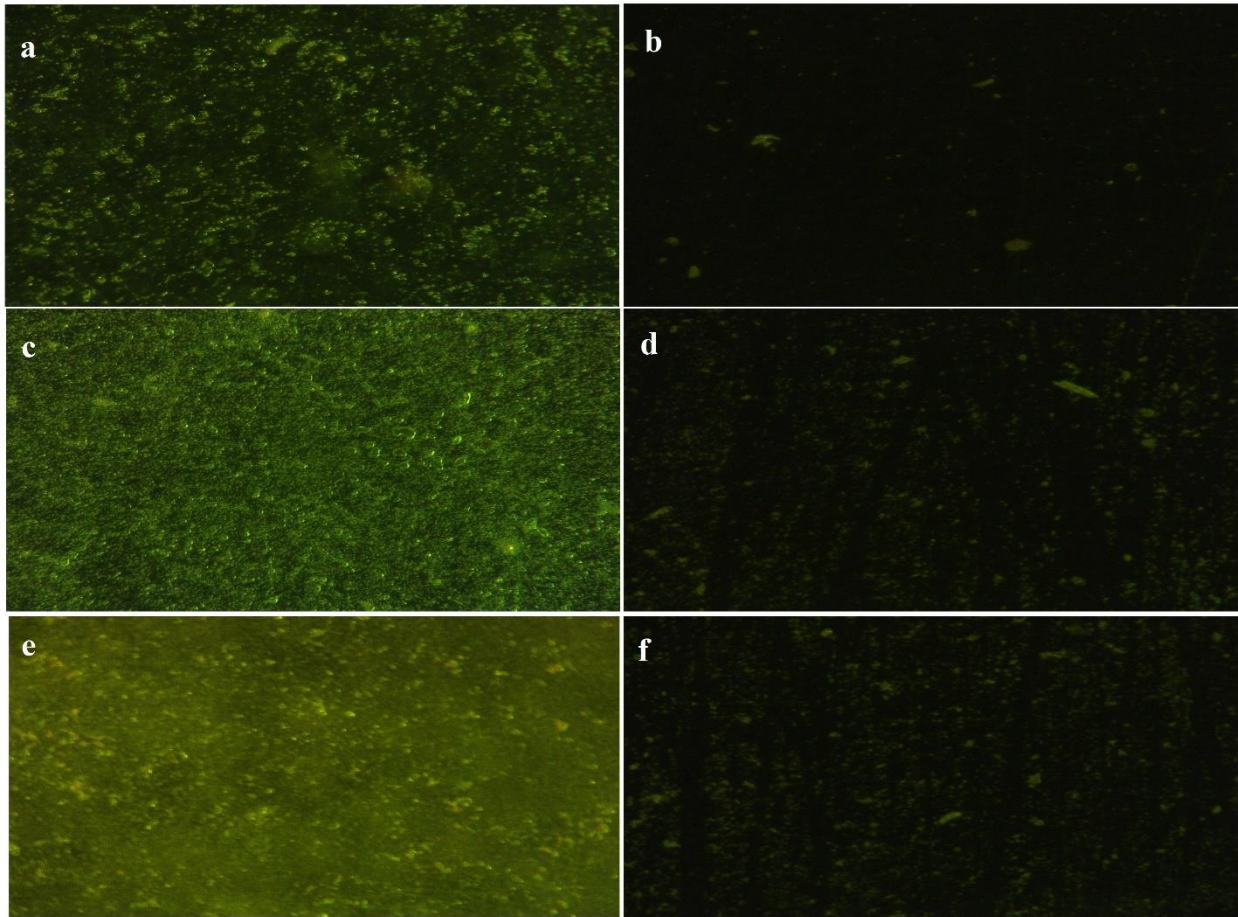

**Figure 6. Fluorescence microscopic image of treated and untreated bacterial pathogens (a,c,e) shows untreated biofilm formed by *Escherichia coli* AMB4, *Pseudomonas aeruginosa* AMB5, *Staphylococcus aureus* AMB6, (b,d,f) shows synthesized AgNPs treated biofilm formed on catheter by the test pathogens**



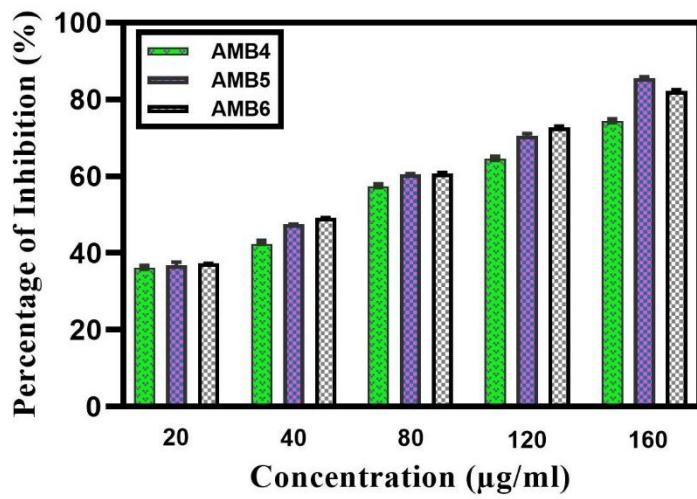

Figure 7. Biofilm **Inhibition Percentage** of pathogens by synthesized AgNPs

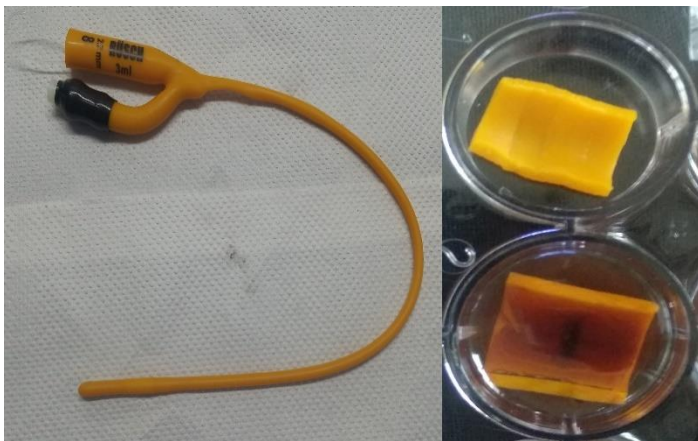

Figure 8. **Coated and uncoated catheter by synthesized AgNPs.**

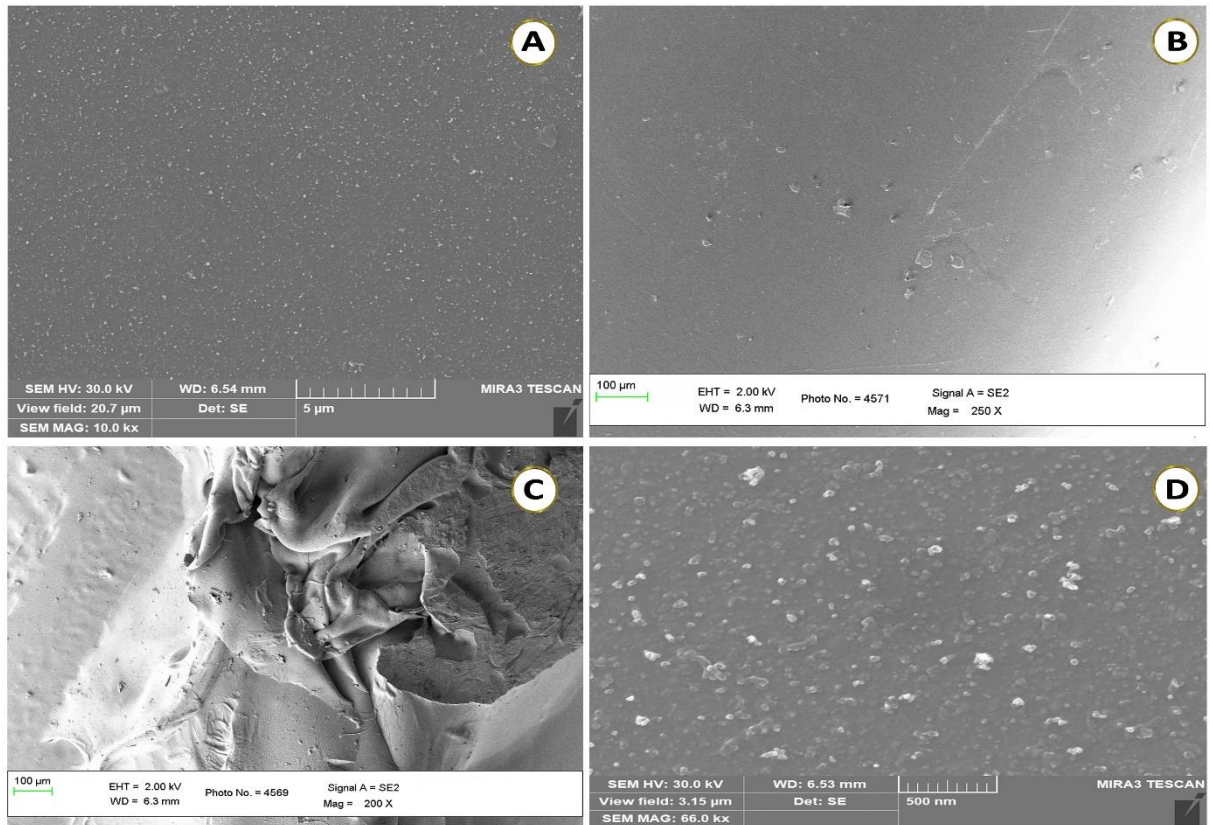

**FIG.9 SEM images of the catheter with and without the synthesized AgNPs A) Uncoated; B) AgNPs coated; C) Uncoated treated; D) Coated treated.**



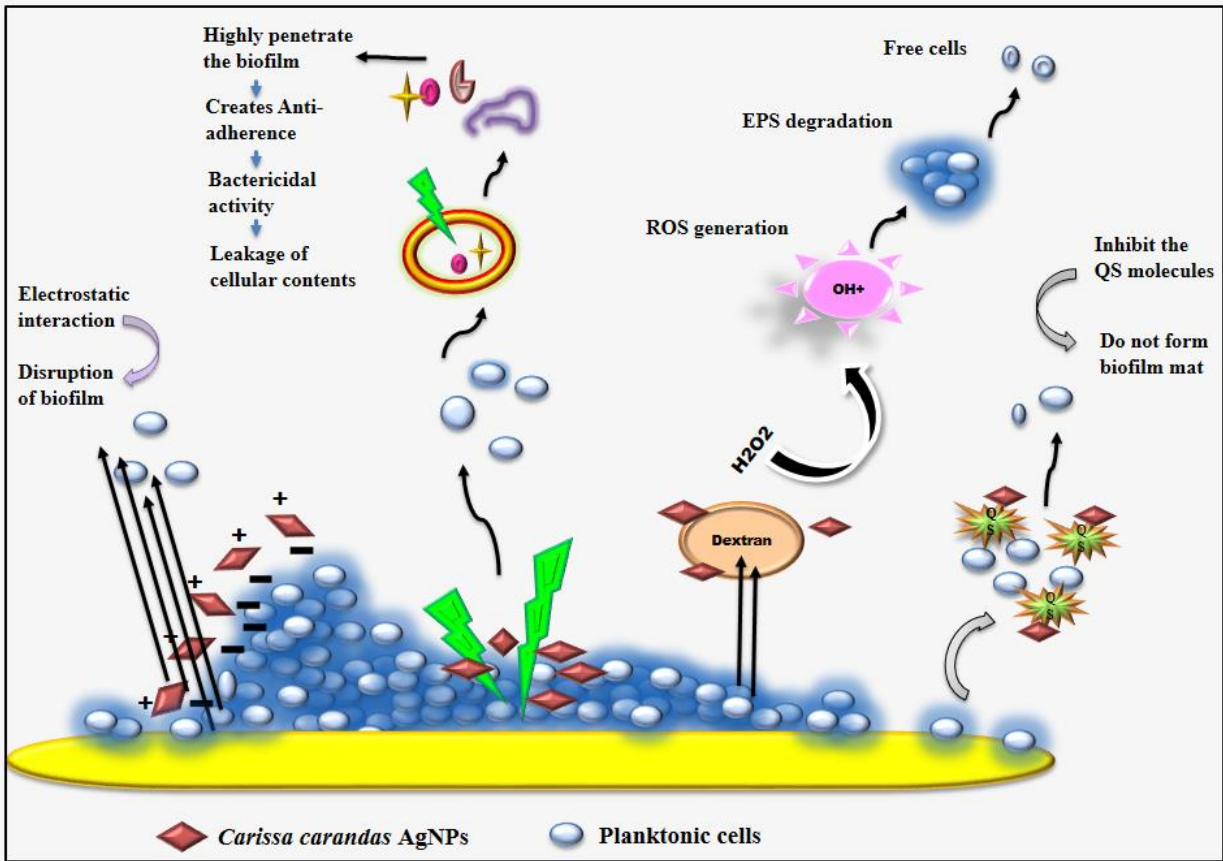

**Figure 10: Proposed biofilm mechanism of *Carissa carandas* mediated synthesized AgNPs**

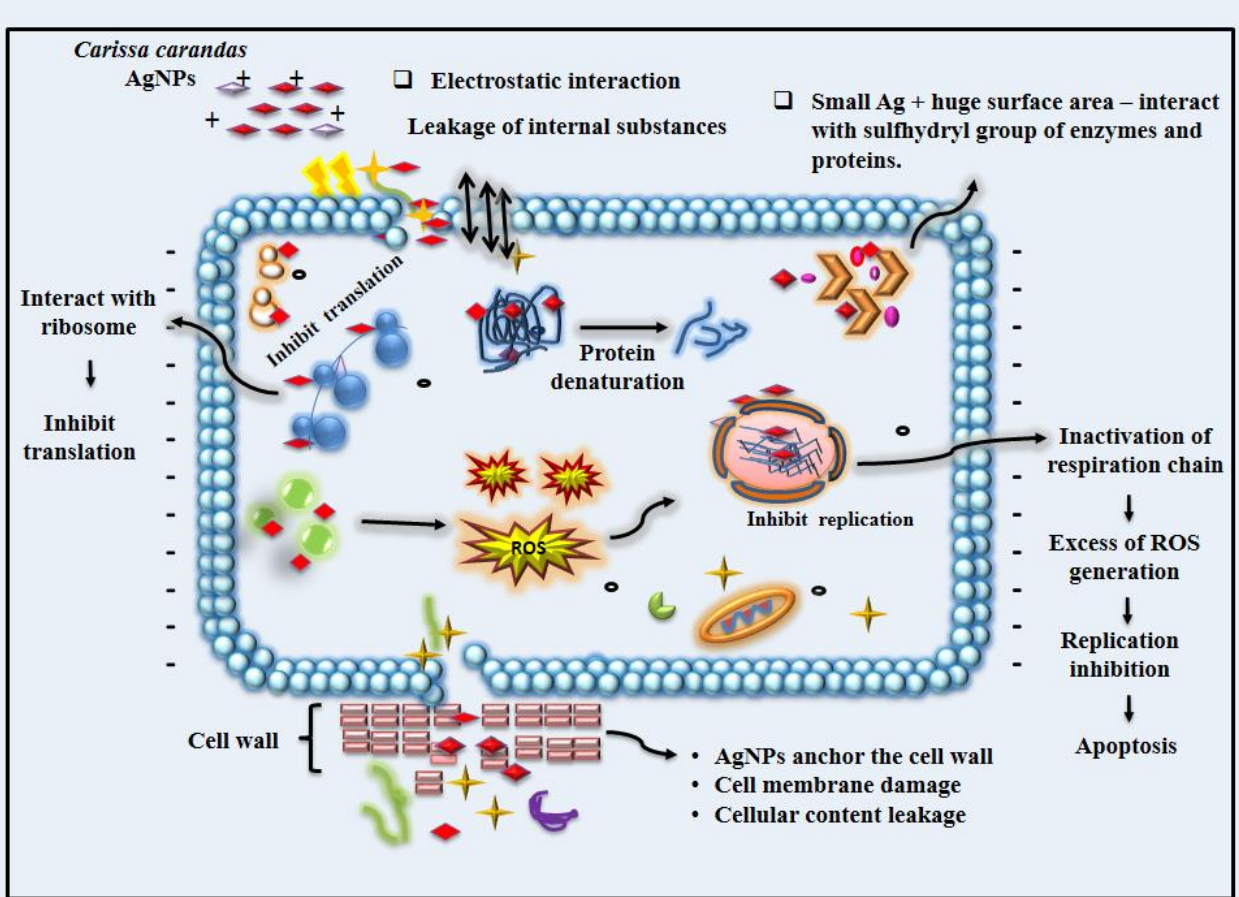

Figure 11: **Proposed mechanism** of Antibacterial activity of *Carissa carandas* mediated synthesis of AgNPs.

### List of Tables

**Table 1** Antibacterial activity against Uropathogens

| Bacteria             | ZoI of <i>C. carandas</i> (mm) |         |          |          |           |
|----------------------|--------------------------------|---------|----------|----------|-----------|
|                      | 25µg/ml                        | 50µg/ml | 75 µg/ml | 100µg/ml | 125 µg/ml |
| <i>S. aureus</i>     | 8±0.3                          | 10 ±0.3 | 13 ±0.3  | 15 ±0.3  | 17 ±0.1   |
| <i>E. coli</i>       | 10 ±0.1                        | 13 ±0.2 | 13 ±0.2  | 13 ±0.3  | 15 ±0.2   |
| <i>P. aeruginosa</i> | 8 ±0.2                         | 9 ±0.2  | 10 ±0.5  | 13 ±0.2  | 15 ±0.1   |

**Table 2** Comparative analysis against Uropathogens (ZOI)

| Strains              | ZoI of <i>C. carandas</i> (mm) |         |        |               |                   |                 |
|----------------------|--------------------------------|---------|--------|---------------|-------------------|-----------------|
|                      | Crude extract                  | AgNo3   | AgNPs  | Ciprofloxacin | Uncoated catheter | Coated Catheter |
| <i>S. aureus</i>     | -                              | 11 ±0.3 | 17±0.2 | 16±0.3        | No zone           | -               |
| <i>E. coli</i>       | -                              | 13±0.1  | 21±0.3 | 17±0.2        | No zone           | -               |
| <i>P. aeruginosa</i> | -                              | 10±0.4  | 13±0.3 | 10±0.1        | No zone           | -               |

**Table 3** Zone of Inhibition of different antibiotics against uropathogens with presence and absence of AgNPs.

| Strains              | Antibiotics   | ZoI (mm)        |                        |                                           |
|----------------------|---------------|-----------------|------------------------|-------------------------------------------|
|                      |               | Antibiotics (a) | Antibiotic + AgNPs (b) | Increase in fold area ( $b^2 - a^2/a^2$ ) |
| <i>S. aureus</i>     | Ciprofloxacin | 16              | 19                     | 0.41                                      |
|                      | Gentamycin    | 27              | 29                     | 0.15                                      |
|                      | Trimethoprim  | No zone         | 11                     | 2.3                                       |
| <i>E. coli</i>       | Ciprofloxacin | 22              | 24                     | 0.19                                      |
|                      | Gentamycin    | 19              | 20                     | 0.10                                      |
|                      | Trimethoprim  | 7               | 10                     | 1.04                                      |
| <i>P. aeruginosa</i> | Ciprofloxacin | 23              | 25                     | 0.18                                      |
|                      | Gentamycin    | 16              | 19                     | 0.41                                      |
|                      | Trimethoprim  | 5               | 11                     | 3.84                                      |



Click here to access/download  
**Supporting Information**  
Graphical Abstract CC.docx



Supplement: pone.0256748.s004.pdf [file pone.0256748.s004.pdf]
