# Supplementary material for: Bioengineered phytomolecules-capped silver nanoparticles using Carissa carandas leaf extract to embed on to urinary catheter to combat UTI pathogens
Source: PubMed Central journal article supplement (PMC8412375; doi:10.1371/journal.pone.0256748), 2021-09-02
Supplement: pone.0256748.s001.pdf [file pone.0256748.s001.pdf]

## Supplementary figures

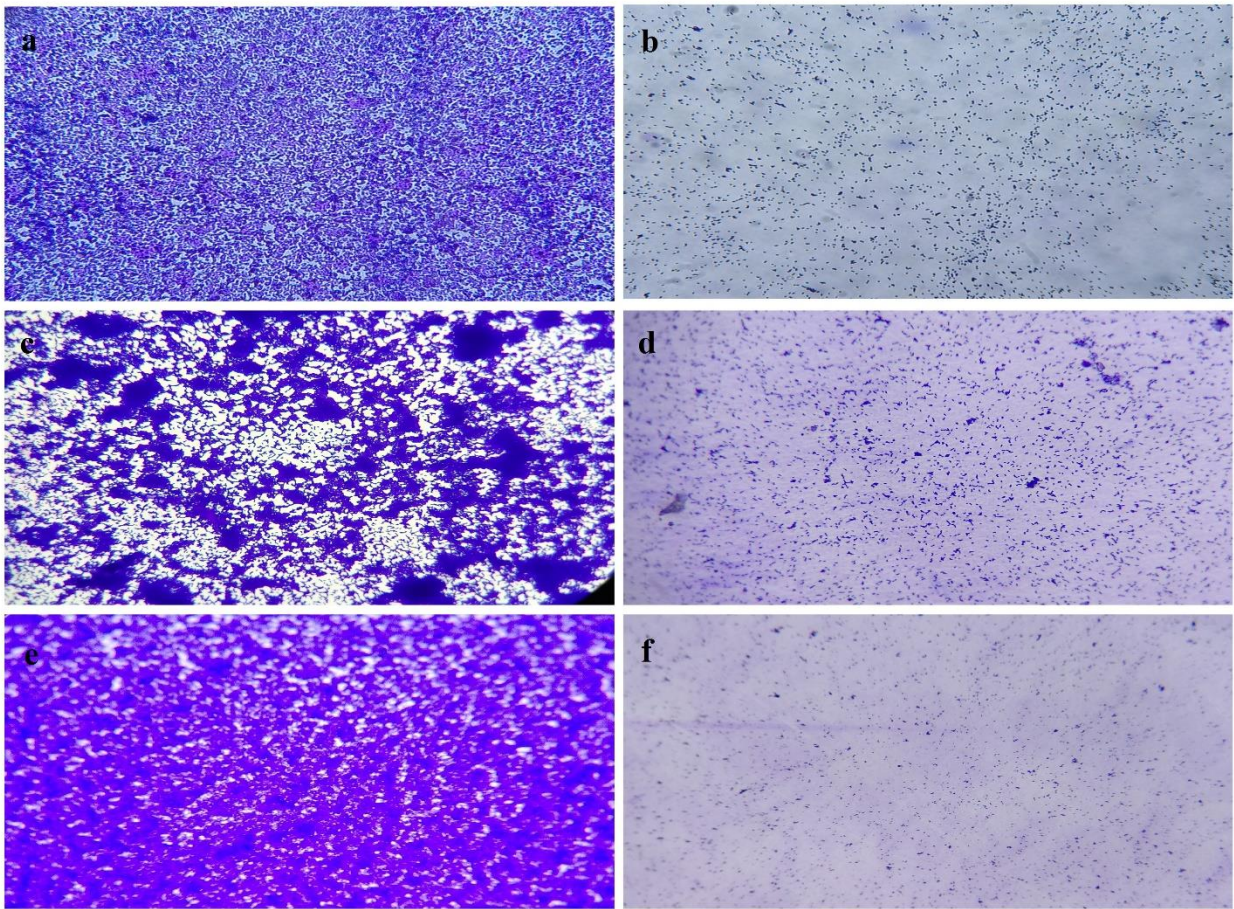

**S1 Fig.** Light microscopic image of biofilm inhibition in AgNPs coated and uncoated urinary catheter. [a, c, e] shows the biofilm formed on the surface of urinary catheter by *Escherichia coli* AMB4, *Pseudomonas aeruginosa* AMB5, *Staphylococcus aureus* AMB6 acts as control and [b, d, f] shows the biofilm inhibition activity of AgNPs coated catheter against *Escherichia coli* AMB4, *Pseudomonas aeruginosa* AMB5, *Staphylococcus aureus* AMB6.
